# Supplementary material for: Quantifying uncertainty about future antimicrobial resistance: Comparing structured expert judgment and statistical forecasting methods
Source: PubMed Central journal article supplement (PMC6611586; doi:10.1371/journal.pone.0219190), 2019-07-05
Supplement: pone.0219190.s001.pdf [file pone.0219190.s001.pdf]

## Additional methods

Exponential smoothing attaches greater weights to more recent observations. Here we describe each of the exponential smoothing methods we apply. Please note that the notation is the same as in [1].

Simple exponential smoothing is a weighted average of all historical observations as follows (equations from [1]):

$$\hat{y}_{t+h|t} = l_t$$
$$l_t = \alpha y_t + (1 - \alpha)l_{t-1}$$

where  $l_t$  is the estimate for the level at time  $t$  and  $0 \leq \alpha \leq 1$  is the level smoothing parameter.

In Holt's linear trend method, we weight both the level and the trend as follows (equations from [1]):

$$\hat{y}_{t+h|t} = l_t + hb_t$$
$$l_t = \alpha y_t + (1 - \alpha)(l_{t-1} + b_{t-1})$$
$$b_t = \beta(l_t - l_{t-1}) + (1 - \beta)b_{t-1}$$

where  $l_t$  is the estimate for the level at time  $t$ ,  $0 \leq \alpha \leq 1$  is the level smoothing parameter, and  $b_t$  is the estimate for the trend at time  $t$ ,  $0 \leq \beta \leq 1$  is the trend smoothing parameter.

Lastly, we introduce a dampened trend in Holt's linear method as follows (equations from [1]):

$$\hat{y}_{t+h|t} = l_t + (\theta + \dots + \theta^h)b_t$$
$$l_t = \alpha y_t + (1 - \alpha)(l_{t-1} + \theta b_{t-1})$$

$$b_t = \beta(l_t - l_{t-1}) + (1 - \beta)\theta b_{t-1}$$

where  $0 < \theta < 1$  is the dampening parameter.

The exponential smoothing methods provide point estimate forecasts. For further detail on the projection intervals and innovations state space models please see [1] Chapter 7.5.

## Additional results

### Mean absolute scaled error

Table A presents the mean absolute scaled error (MASE) for each of the statistical forecasting models. MASE is based on the model's point predictions.  $MASE = mean(|q_j|)$  where  $q_j$  is the error scaled by the naïve forecast, such that:

$$q_j = \frac{e_j}{\frac{1}{T-1} \sum_{t=2}^T |y_t - y_{t-1}|}$$

A lower MASE indicates better performance. There is no clear pattern for model performance across the different country-pathogen-antibiotic combinations.

Table A. Mean absolute scaled error (MASE) of each statistical forecasting model.

| Country        | Bug       | Drug                     | ETS(ANN) | ETS(AAN) | ETS(AAdN) | ETS(ZZZ) | ARIMA        | Hybrid | ARIMA bounded |              |        |
|----------------|-----------|--------------------------|----------|----------|-----------|----------|--------------|--------|---------------|--------------|--------|
| France         | E. coli   | FQ                       | 0.9286   | 0.875    | 0.7479    | 0.9286   | ARIMA(0,1,0) | 0.8499 | 0.866         | ARIMA(0,1,0) | 0.8436 |
|                |           | 3 <sup>rd</sup> gen Ceph | 0.9286   | 0.6248   | 0.5636    | 0.6248   | ARIMA(0,1,0) | 0.6264 | 0.6256        | ARIMA(0,1,0) | 0.6177 |
|                | K. pneumo | Carbapenems              | 0.6615   | 0.5793   | 0.6342    | 0.6615   | ARIMA(1,1,0) | 0.5514 | 0.5602        | ARIMA(1,1,0) | 0.5514 |
|                |           | 3 <sup>rd</sup> gen Ceph | 0.9091   | 0.533    | 0.3164    | 0.9091   | ARIMA(0,1,0) | 0.6744 | 0.7512        | ARIMA(0,1,0) | 0.6601 |
|                |           | Carbapenems              | 0.8395   | 0.6118   | 0.6854    | 0.8395   | ARIMA(0,0,0) | 0.741  | 0.784         | ARIMA(0,0,0) | 0.7538 |
|                |           | Meticillin (MRSA)        | 0.9334   | 0.3958   | 0.4899    | 0.3958   | ARIMA(1,1,0) | 0.4233 | 0.3546        | ARIMA(1,1,0) | 0.4383 |
| Italy          | E. coli   | FQ                       | 0.9535   | 0.721    | 0.4947    | 0.4947   | ARIMA(0,1,0) | 0.7799 | 0.5583        | ARIMA(0,1,0) | 0.7013 |
|                |           | 3 <sup>rd</sup> gen Ceph | 0.9317   | 0.6081   | 0.5913    | 0.6081   | ARIMA(1,1,0) | 0.4886 | 0.4932        | ARIMA(1,1,0) | 0.4228 |
|                | K. pneumo | Carbapenems              | 0.889    | 0.9686   | 0.8387    | 0.889    | ARIMA(0,1,0) | 0.8897 | 0.8893        | ARIMA(0,1,0) | 0.8896 |
|                |           | 3 <sup>rd</sup> gen Ceph | 0.9092   | 0.6471   | 0.6599    | 0.9092   | ARIMA(0,1,0) | 0.8509 | 0.7807        | ARIMA(0,1,0) | 0.7818 |
|                |           | Carbapenems              | 0.9      | 1.1871   | 1.0642    | 0.9      | ARIMA(0,1,0) | 1.4144 | 0.9004        | ARIMA(0,1,0) | 0.9006 |
|                |           | Meticillin (MRSA)        | 0.8842   | 0.8752   | 0.732     | 0.8842   | ARIMA(0,1,0) | 0.9377 | 0.897         | ARIMA(0,1,0) | 0.938  |
| Spain          | E. coli   | FQ                       | 0.9334   | 0.656    | 0.4829    | 0.4829   | ARIMA(2,2,2) | 0.2842 | 0.3122        | ARIMA(0,2,1) | 0.6683 |
|                |           | 3 <sup>rd</sup> gen Ceph | 0.9341   | 0.5716   | 0.556     | 0.5716   | ARIMA(0,2,0) | 0.568  | 0.5675        | ARIMA(0,2,0) | 0.5787 |
|                | K. pneumo | Carbapenems              | 0.9705   | 0.9301   | 1.1177    | 0.9705   | ARIMA(0,0,0) | 0.9705 | 0.9705        | ARIMA(0,0,0) | 0.9703 |
|                |           | 3 <sup>rd</sup> gen Ceph | 0.9091   | 0.544    | 0.5414    | 0.9091   | ARIMA(0,1,0) | 0.764  | 0.825         | ARIMA(0,1,0) | 0.7651 |
|                |           | Carbapenems              | 0.9436   | 0.6945   | 0.7379    | 0.9436   | ARIMA(0,1,0) | 1.1259 | 0.922         | ARIMA(0,1,0) | 0.9098 |
|                |           | Meticillin (MRSA)        | 0.9663   | 0.8722   | 0.895     | 0.9663   | ARIMA(0,0,0) | 0.9007 | 0.9106        | ARIMA(0,0,0) | 0.9001 |
| United Kingdom | E. coli   | FQ                       | 0.9334   | 0.776    | 0.6984    | 0.9334   | ARIMA(0,2,1) | 0.7656 | 0.7428        | ARIMA(0,2,1) | 0.7527 |
|                |           | 3 <sup>rd</sup> gen Ceph | 0.9334   | 0.774    | 0.7203    | 0.9334   | ARIMA(0,1,0) | 0.789  | 0.8182        | ARIMA(0,1,0) | 0.7827 |
|                | K. pneumo | Carbapenems              | 0.7365   | 0.7124   | 0.7687    | 0.7365   | ARIMA(0,0,0) | 0.7365 | 0.7365        | ARIMA(0,0,0) | 0.7365 |
|                |           | 3 <sup>rd</sup> gen Ceph | 0.7198   | 0.7161   | 0.7002    | 0.7198   | ARIMA(0,0,0) | 0.7198 | 0.7198        | ARIMA(0,0,0) | 0.7205 |
|                |           | Carbapenems              | 0.8712   | 0.7753   | 0.7414    | 0.8712   | ARIMA(0,0,0) | 0.8708 | 0.871         | ARIMA(0,0,0) | 0.8699 |
|                |           | Meticillin (MRSA)        | 0.9375   | 0.848    | 0.8644    | 0.9375   | ARIMA(0,1,0) | 0.8466 | 0.8229        | ARIMA(0,1,0) | 0.8106 |

## Expert and decision maker scores

Table B. Scores and weights of experts, the equal-weight decision maker (EW), and the performance-weight decision maker (PW). Experts with non-zero weight in the PW are bolded.

| Expert ID             | Statistical accuracy | Information score |                       | Combined score  | Weight in PW |
|-----------------------|----------------------|-------------------|-----------------------|-----------------|--------------|
|                       |                      | All variables     | Calibration variables |                 |              |
| <b>France</b>         |                      |                   |                       |                 |              |
| 1                     | 2.20E-04             | 1.796             | 1.471                 | 3.24E-04        | 0            |
| 2                     | 0.031                | 1.176             | 1.379                 | 0.043           | 0            |
| 3                     | 1.99E-07             | 0.706             | 0.716                 | 1.43E-07        | 0            |
| 4                     | 0.002                | 0.665             | 0.671                 | 0.001           | 0            |
| <b>5</b>              | <b>0.652</b>         | <b>1.528</b>      | <b>1.958</b>          | <b>1.276</b>    | <b>1</b>     |
| PW                    | 0.652                | 1.528             | 1.958                 | 1.276           |              |
| EW                    | 0.078                | 0.519             | 0.433                 | 0.034           |              |
| <b>Italy</b>          |                      |                   |                       |                 |              |
| 1                     | 0.027                | 0.9               | 0.632                 | 0.017           | 0            |
| 2                     | 0.017                | 0.456             | 0.461                 | 0.008           | 0            |
| <b>3</b>              | <b>0.447</b>         | <b>0.676</b>      | <b>0.466</b>          | <b>0.209</b>    | <b>1</b>     |
| 4                     | 5.56E-06             | 0.987             | 0.99                  | 5.50E-06        | 0            |
| PW                    | 0.447                | 0.676             | 0.466                 | 0.209           |              |
| EW                    | 0.218                | 0.198             | 0.197                 | 0.043           |              |
| <b>Spain</b>          |                      |                   |                       |                 |              |
| <b>1</b>              | <b>1.22E-05</b>      | <b>0.958</b>      | <b>0.572</b>          | <b>6.98E-06</b> | <b>0.23</b>  |
| 2                     | 1.03E-09             | 1.486             | 1.452                 | 1.49E-09        | 0            |
| 3                     | 1.99E-07             | 0.258             | 0.424                 | 8.43E-08        | 0            |
| 4                     | 3.23E-07             | 1.508             | 1.642                 | 5.31E-07        | 0            |
| <b>5</b>              | <b>2.24E-05</b>      | <b>1.378</b>      | <b>1.043</b>          | <b>2.33E-05</b> | <b>0.77</b>  |
| PW                    | 3.59E-05             | 0.869             | 0.667                 | 2.39E-05        |              |
| EW                    | 1.22E-05             | 0.366             | 0.231                 | 2.82E-06        |              |
| <b>United Kingdom</b> |                      |                   |                       |                 |              |
| 1                     | 0.002                | 0.399             | 0.473                 | 0.001           | 0            |
| <b>2</b>              | <b>0.016</b>         | <b>1.161</b>      | <b>1.828</b>          | <b>0.028</b>    | <b>0.091</b> |
| <b>3</b>              | <b>0.181</b>         | <b>1.096</b>      | <b>1.13</b>           | <b>0.205</b>    | <b>0.658</b> |
| <b>4</b>              | <b>0.185</b>         | <b>1.043</b>      | <b>0.393</b>          | <b>0.073</b>    | <b>0.234</b> |
| <b>5</b>              | <b>0.003</b>         | <b>1.856</b>      | <b>1.99</b>           | <b>0.005</b>    | <b>0.017</b> |
| 6                     | 1.96E-08             | 1.769             | 0.787                 | 1.54E-08        | 0            |
| PW                    | 0.499                | 0.725             | 0.606                 | 0.302           |              |
| EW                    | 0.132                | 0.532             | 0.331                 | 0.044           |              |

## **Expert and decision maker assessments on calibration questions**

Fig A-D show the individual expert assessments and decision maker assessments for the 10 calibration questions in each country. Calibration questions were based on data from the European Antimicrobial Resistance Surveillance Network (EARS-Net) [2,3] and the European Gonococcal Antimicrobial Surveillance Programme (Euro-GASP) [4]. The full question text and expert data can be found in the elicitation protocol, available in the University of Strathclyde's PURE data repository at <http://dx.doi.org/10.15129/953210ee-27c0-4042-8fd6-f1c5b7325eae>.

**Fig A. France: Expert, equal-weight decision maker (EW), and performance-weight decision maker (PW) assessments for calibration questions.** Boxplots show the median estimate, 50% credible range, and 90% credible range. The dotted line is the realization for that item.

(PW) assessments for calibration questions. Boxplots show the median estimate, 50% credible range, and 90% credible range. The dotted line is the realization for that item.

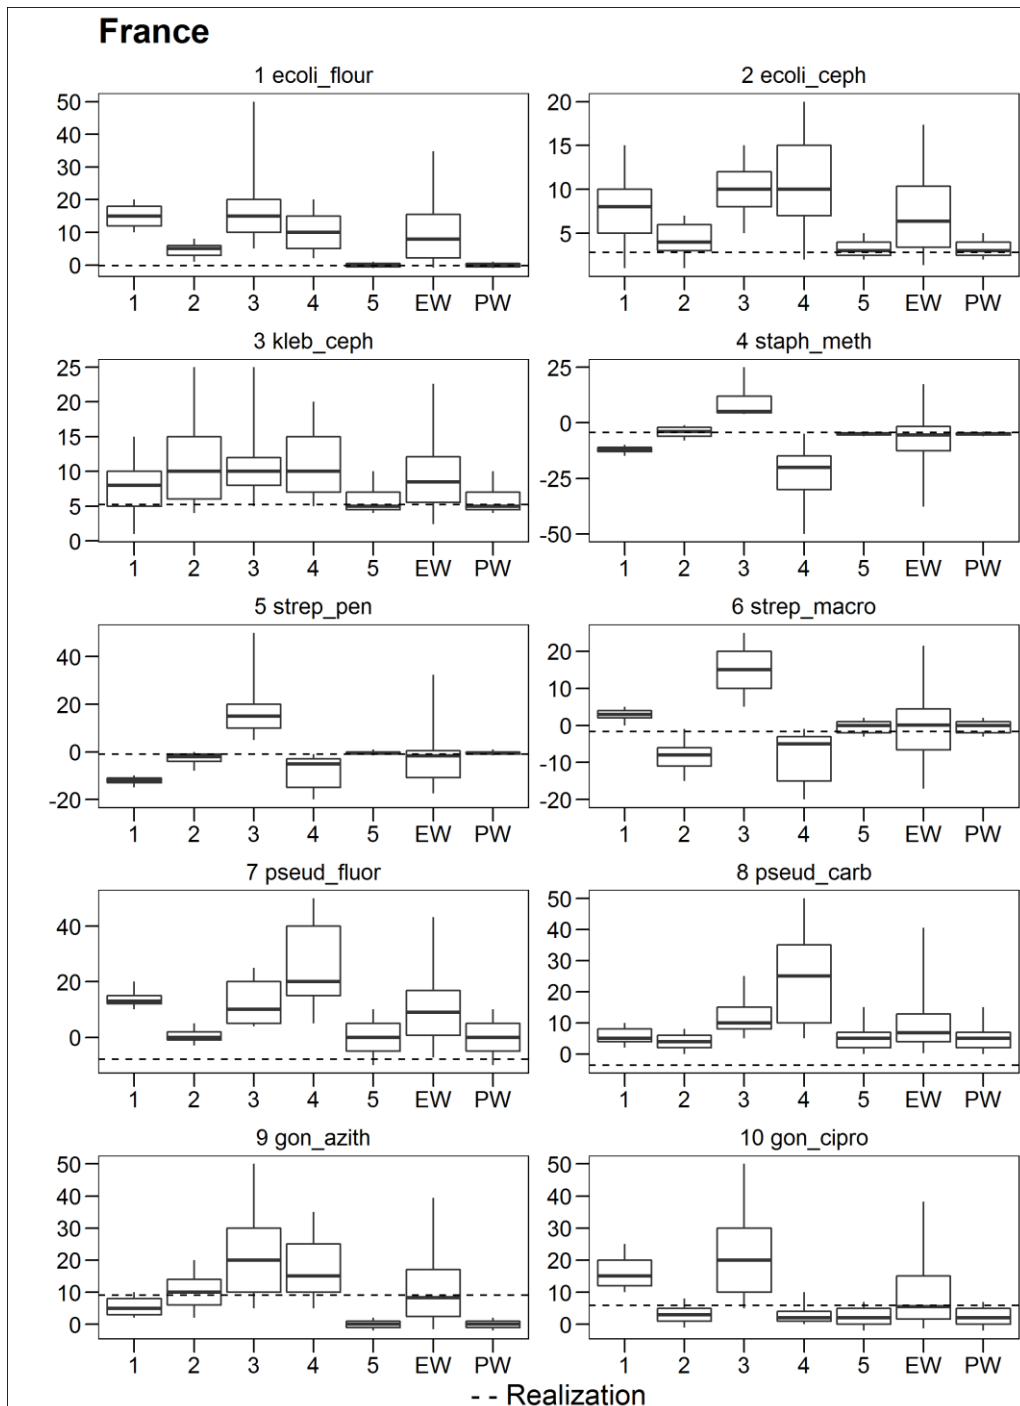

**Fig B. Italy: Expert, equal-weight decision maker (EW), and performance-weight decision maker (PW) assessments for calibration questions.** Boxplots show the median estimate, 50% credible range, and 90% credible range. The dotted line is the realization for that item.

(PW) assessments for calibration questions. Boxplots show the median estimate, 50% credible range, and 90% credible range. The dotted line is the realization for that item.

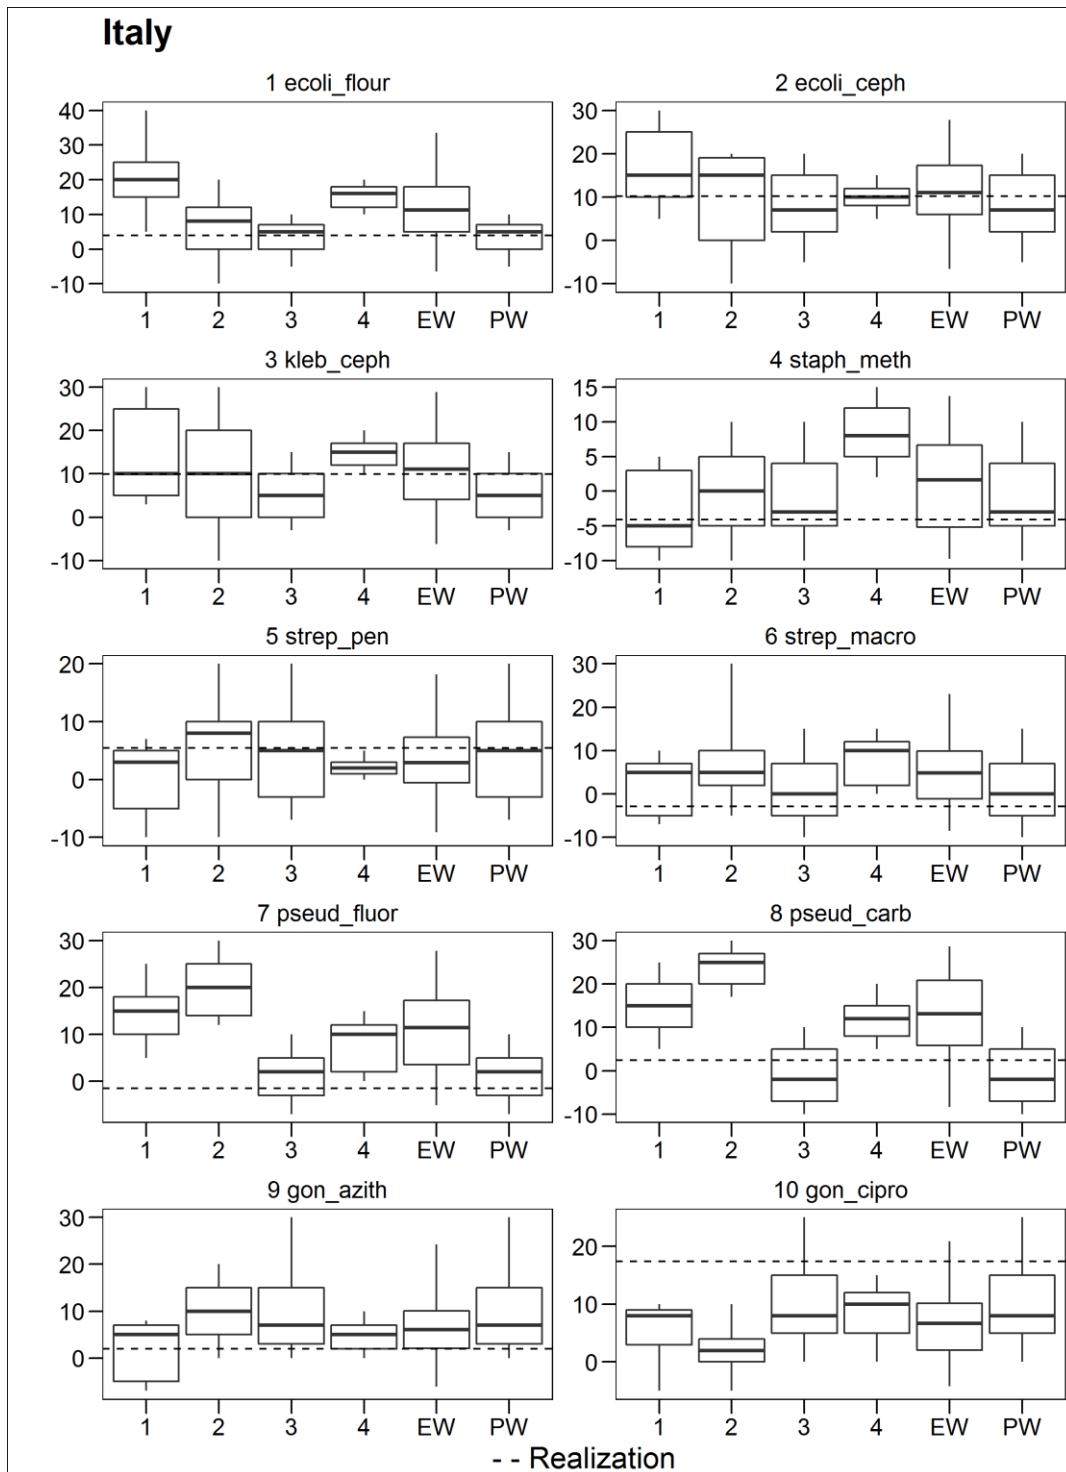

**Fig C. Spain: Expert, equal-weight decision maker (EW), and performance-weight decision maker (PW) assessments for calibration questions.** Boxplots show the median estimate, 50% credible range, and 90% credible range. The dotted line is the realization for that item.

(PW) assessments for calibration questions. Boxplots show the median estimate, 50% credible range, and 90% credible range. The dotted line is the realization for that item.

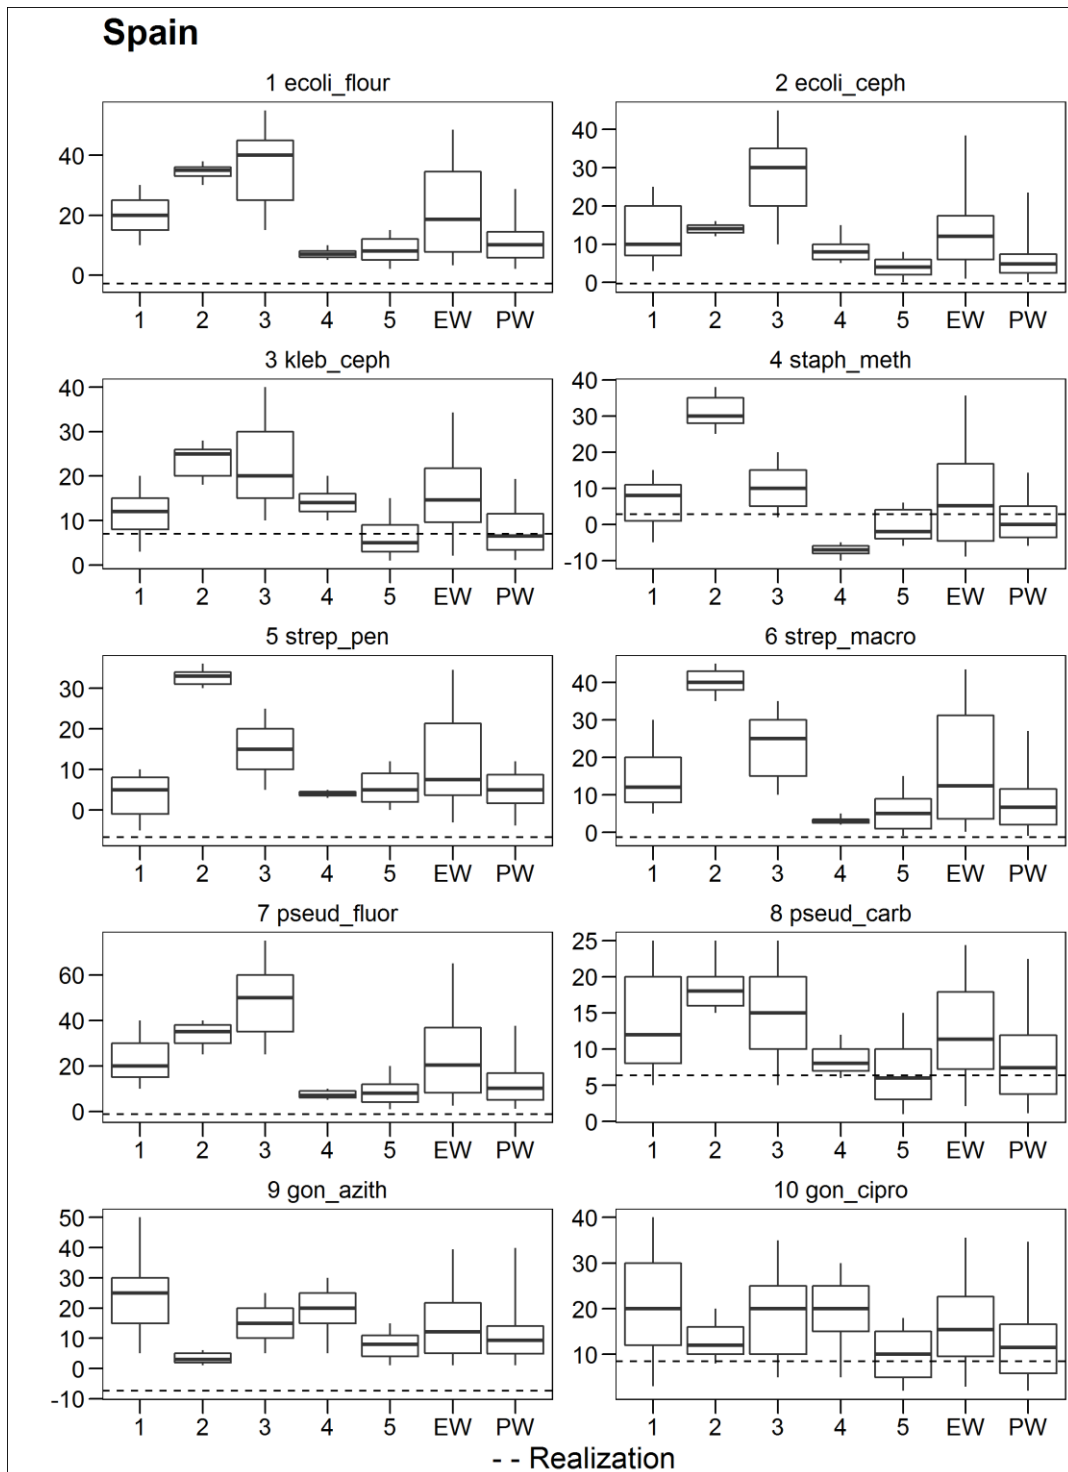



**Fig D. United Kingdom: Expert, equal-weight decision maker (EW), and performance-weight decision maker (PW) assessments for calibration questions.** Boxplots show the median estimate, 50% credible range, and 90% credible range. The dotted line is the realization for that item.

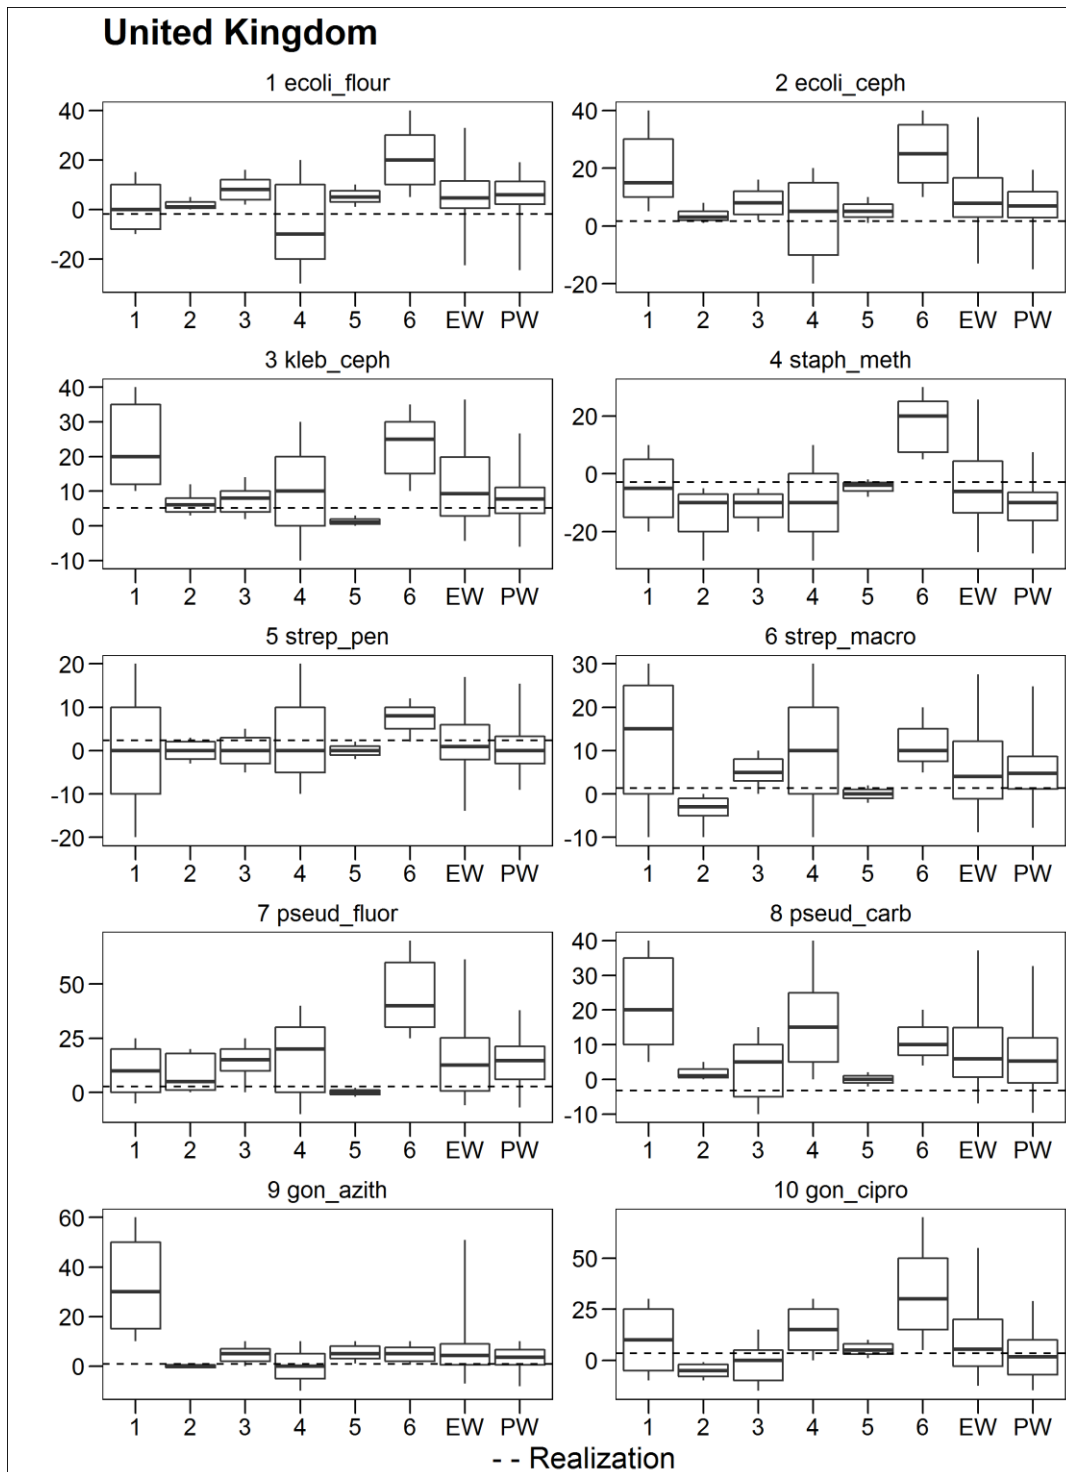

## **Expert assessments for the variables of interest**

Figs E-H show the individual expert assessments and both the equal-weight and performance-weight decision maker assessments for the variables of interest in each country. Figs I-K show results for three pathogen-antibiotic pairs not discussed in the paper, and Fig L provides results for a set of questions about non-invasive isolates.

**Fig E. France: Expert, equal-weight decision maker (EW), and performance-weight decision maker (PW) assessments for the variables of interest.** Boxplots show the median estimate, 50% credible range, and 90% credible range.

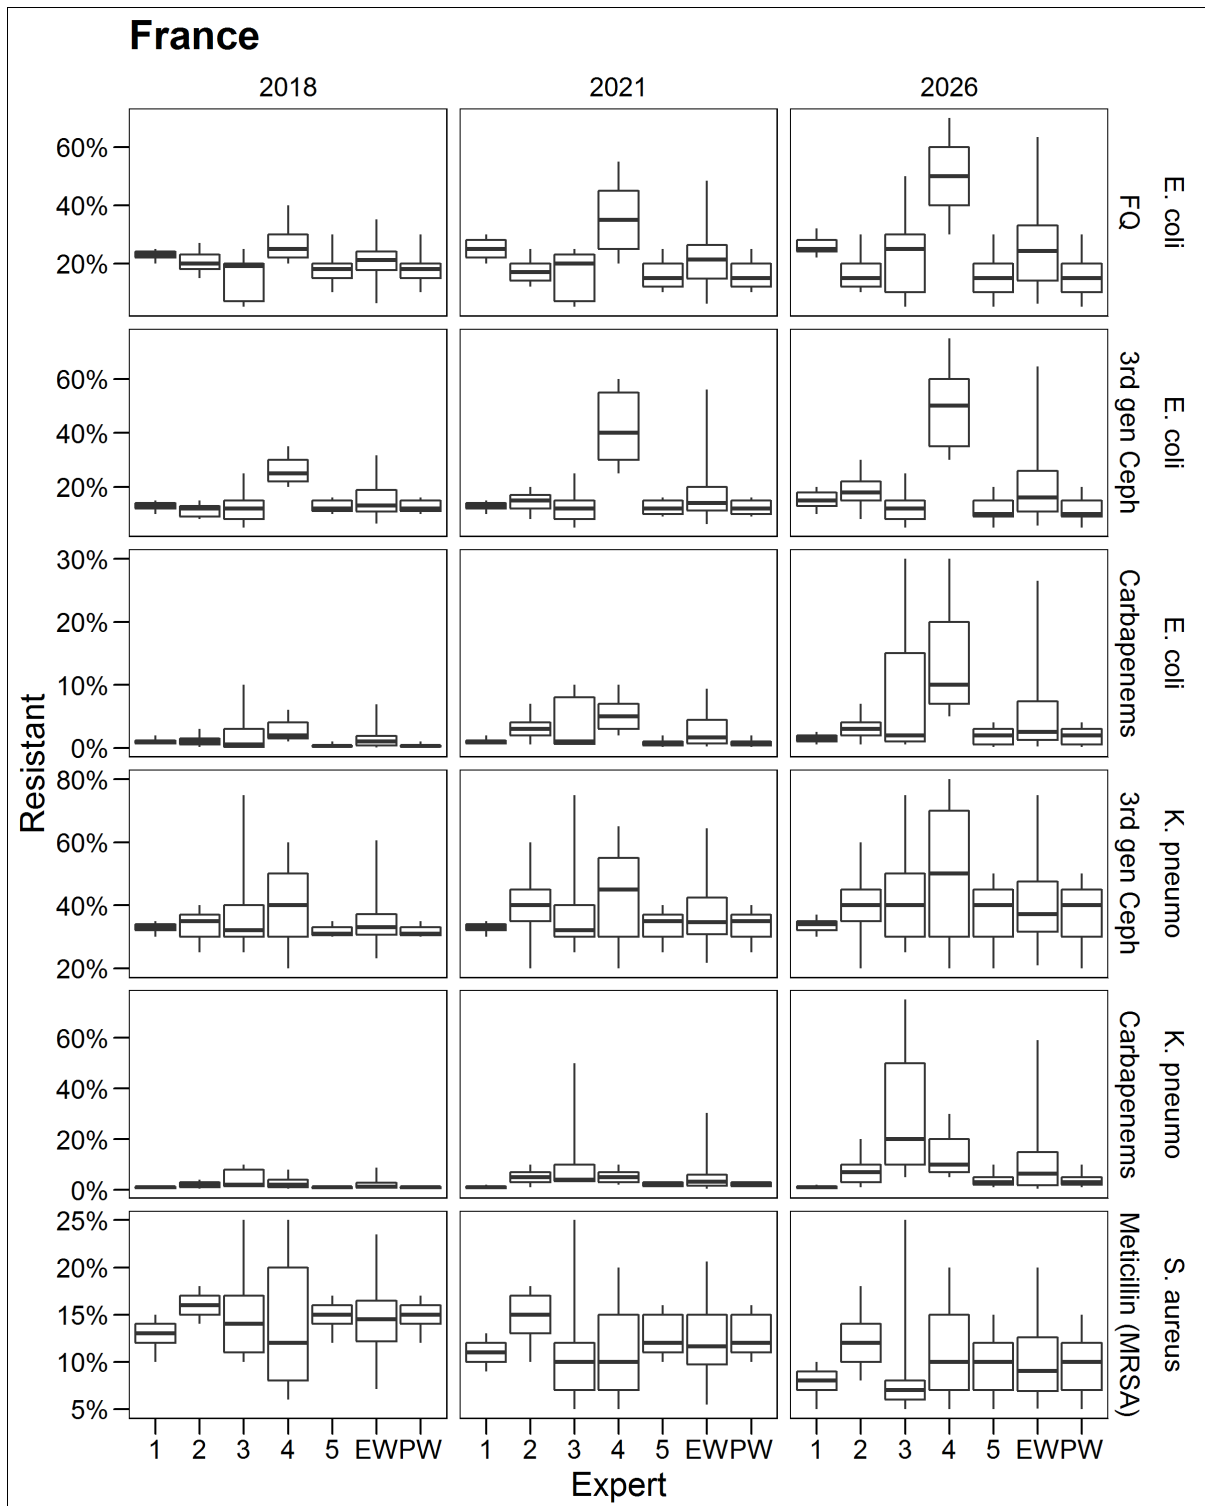

**Fig F. Italy: Expert, equal-weight decision maker (EW), and performance-weight decision maker (PW) assessments for the variables of interest. Boxplots show the median estimate, 50% credible range, and 90% credible range.**

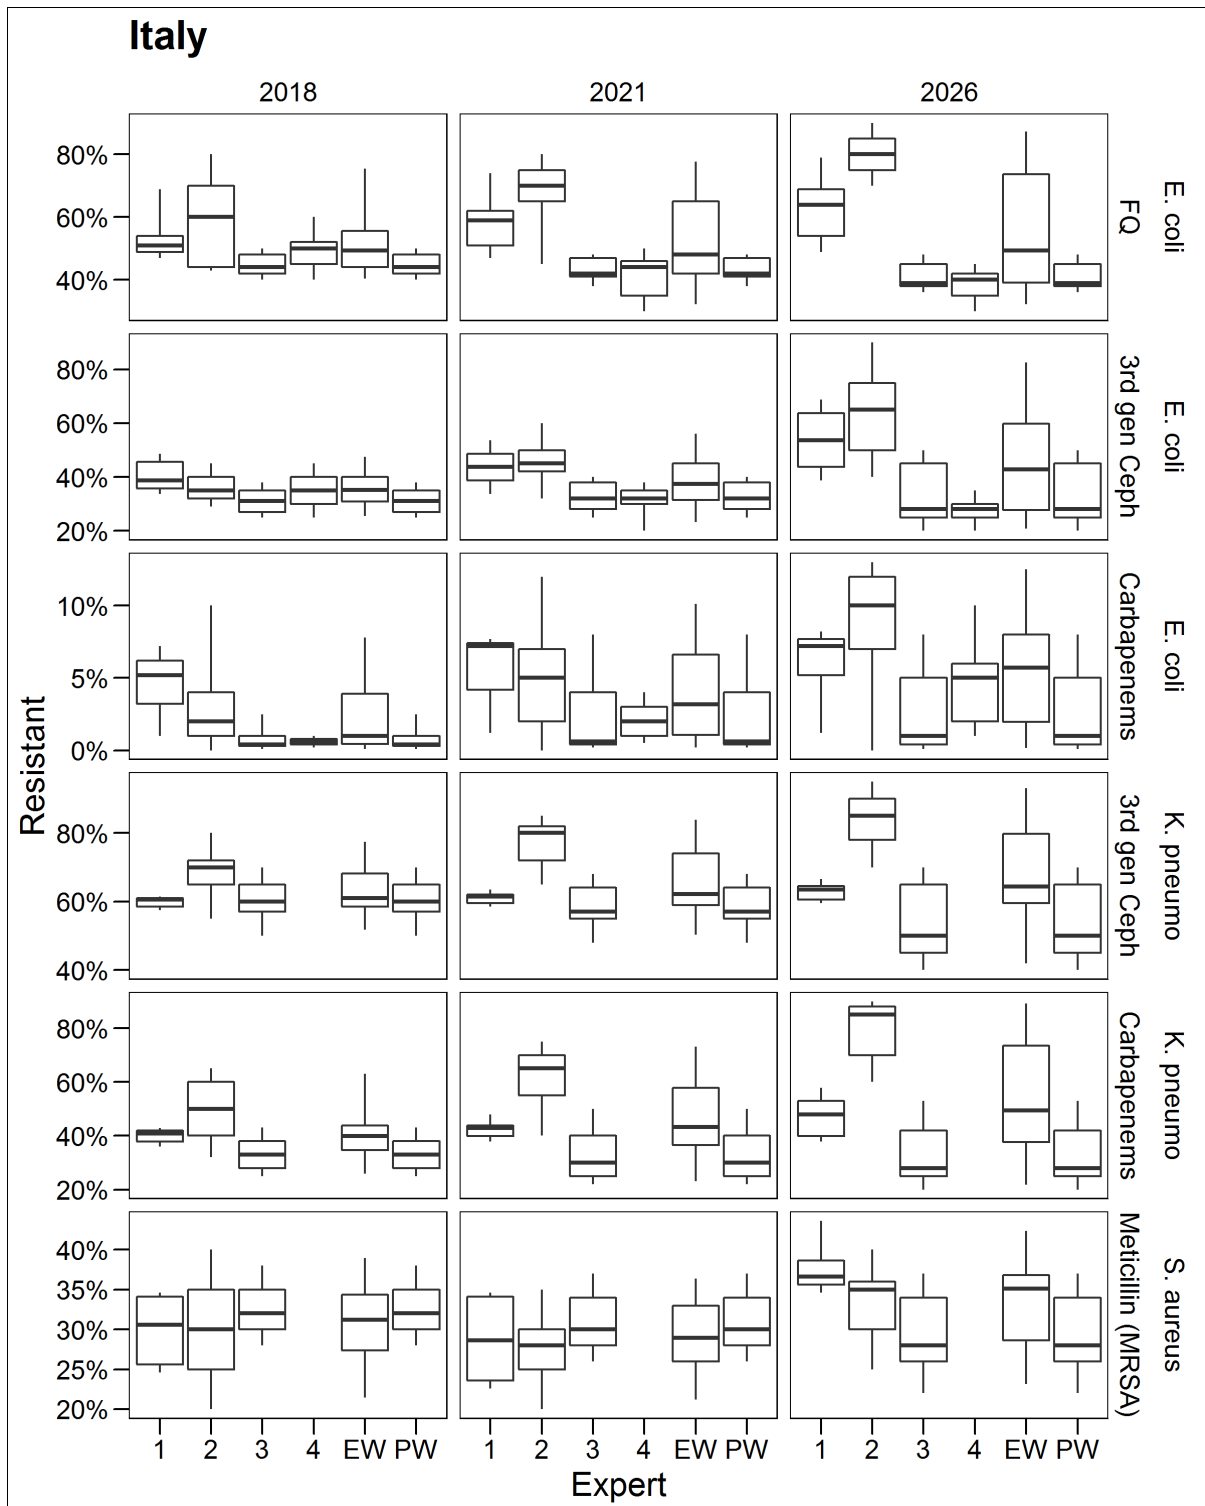

**Fig G. Spain: Expert, equal-weight decision maker (EW), and performance-weight decision maker (PW) assessments for the variables of interest. Boxplots show the median estimate, 50% credible range, and 90% credible range.**

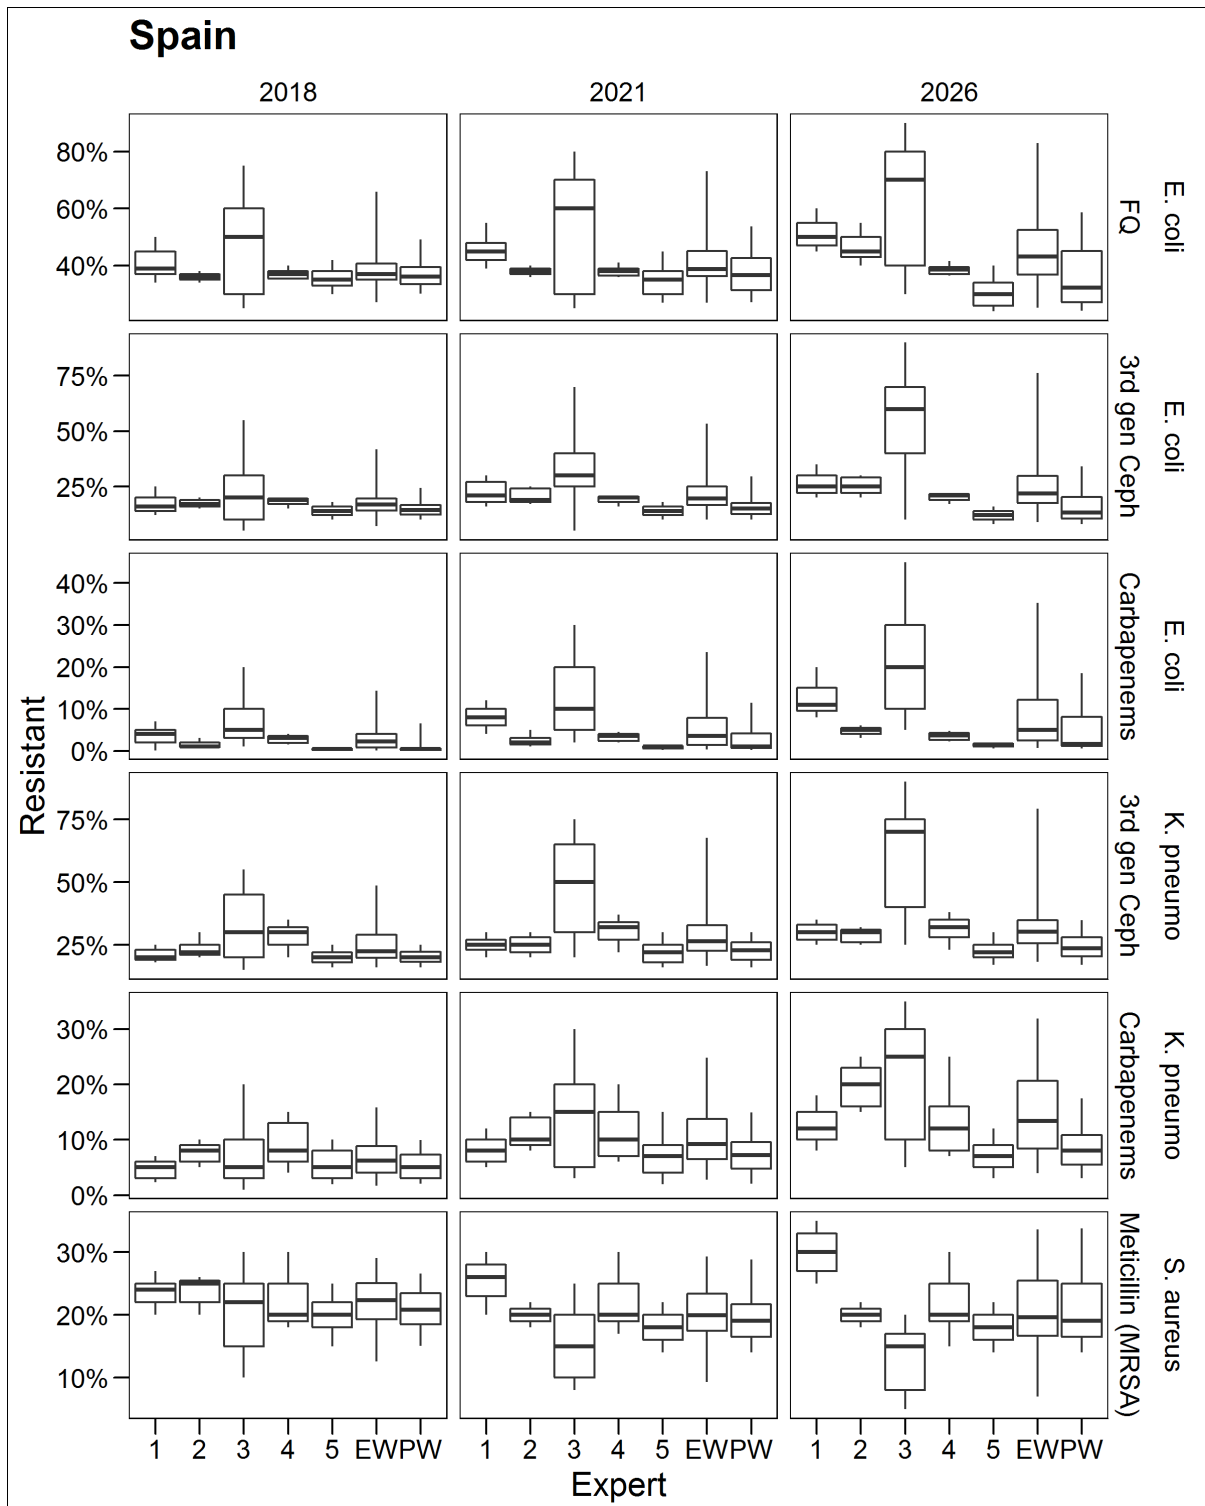

**Fig H. United Kingdom: Expert, equal-weight decision maker (EW), and performance-weight decision maker (PW) assessments for the variables of interest. Boxplots show the median estimate, 50% credible range, and 90% credible range.**

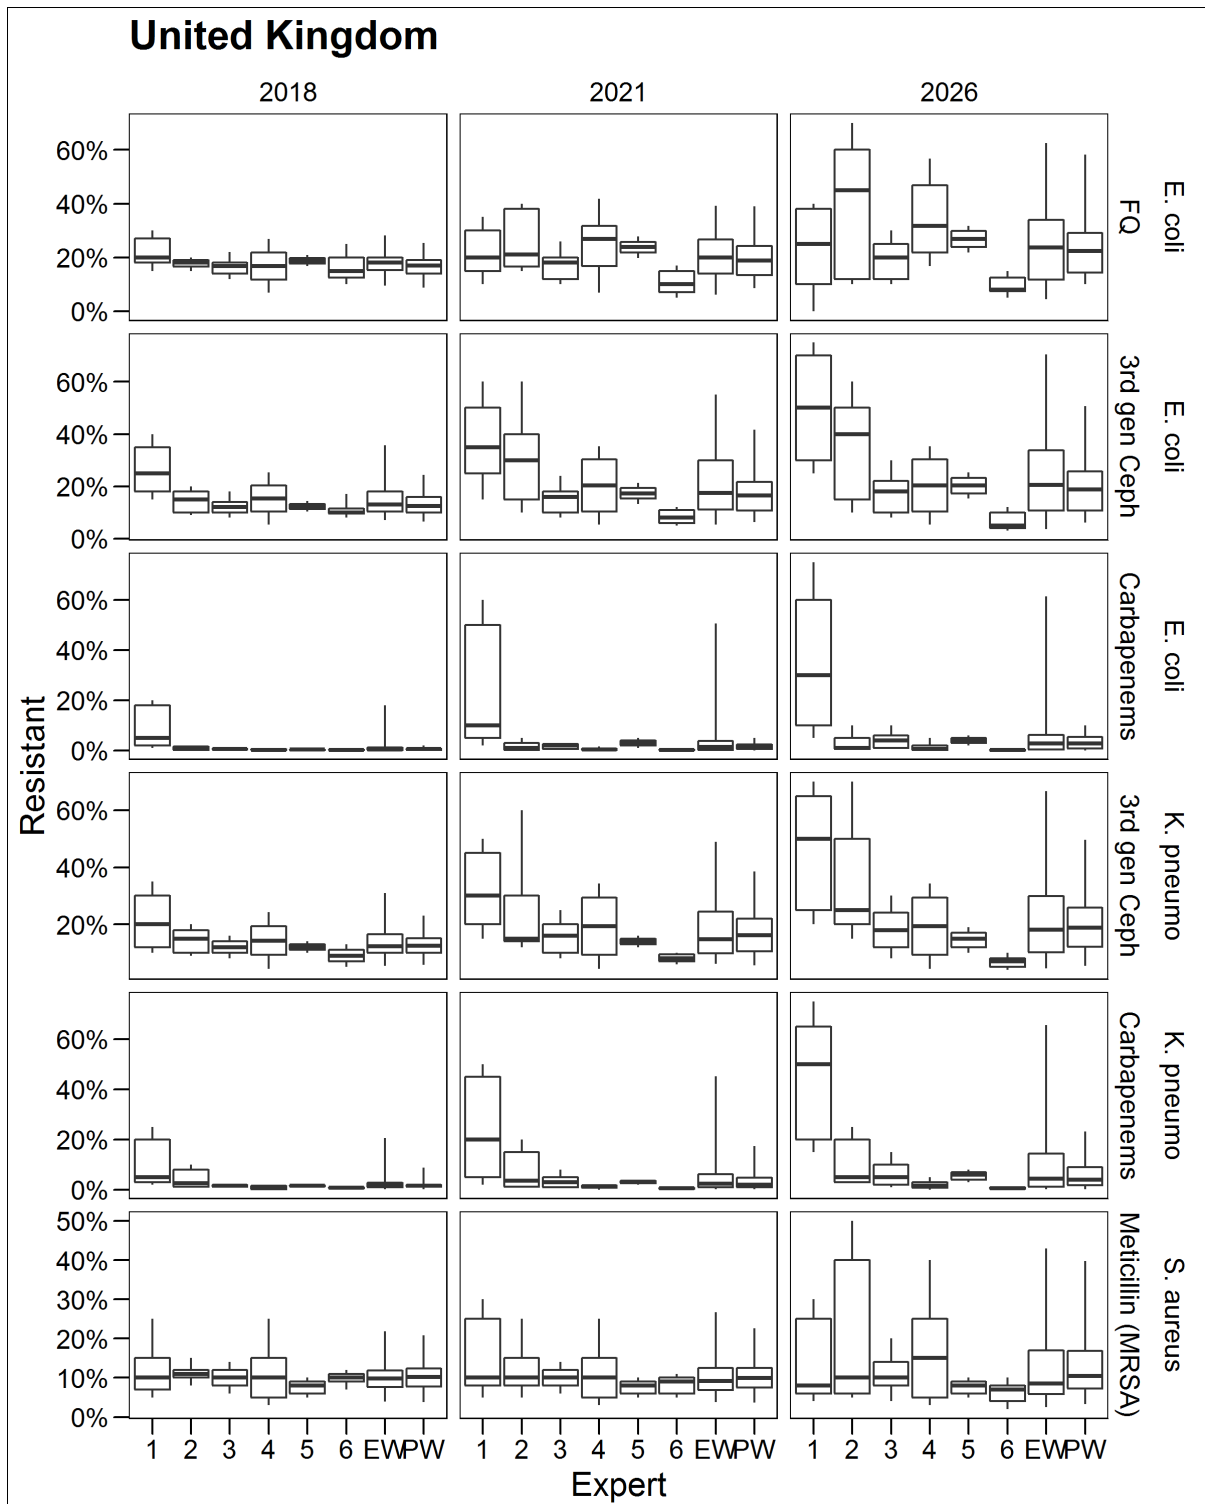



**Fig 1. Expert, equal-weight decision maker (EW), and performance-weight decision maker (PW) assessments for *Streptococcus pneumoniae* and intermediate susceptibility to penicillins. Boxplots show the median estimate, 50% credible range, and 90% credible range.**

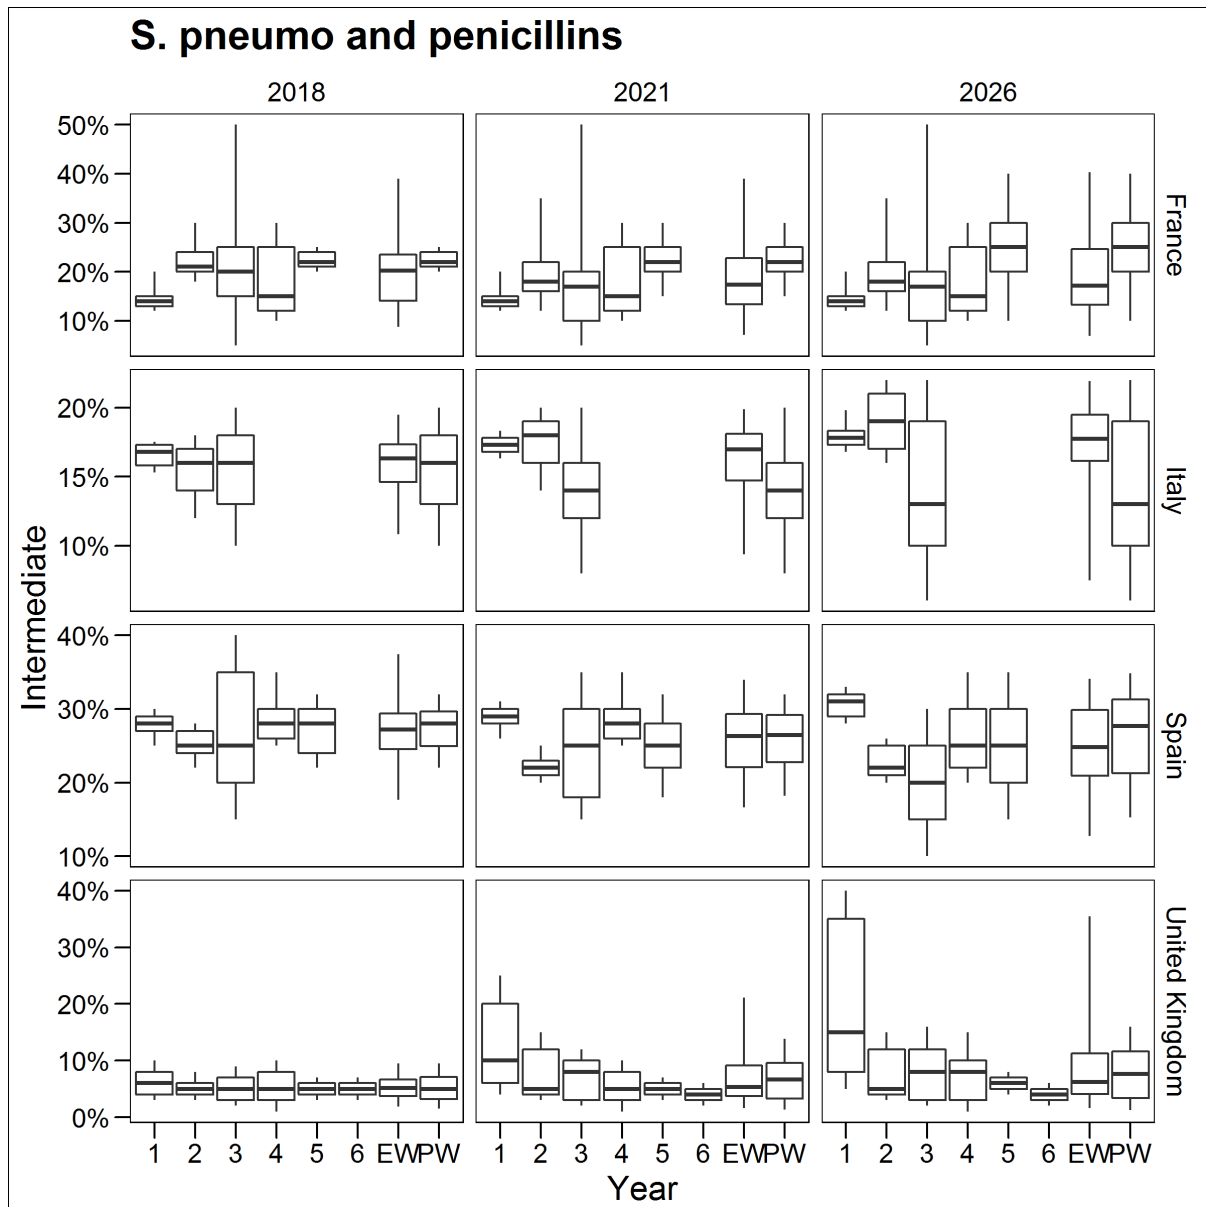



**Fig J. Expert, equal-weight decision maker (EW), and performance-weight decision maker (PW) assessments for *Neisseria gonorrhoeae* resistance to third-generation cephalosporins. Boxplots show the median estimate, 50% credible range, and 90% credible range.**

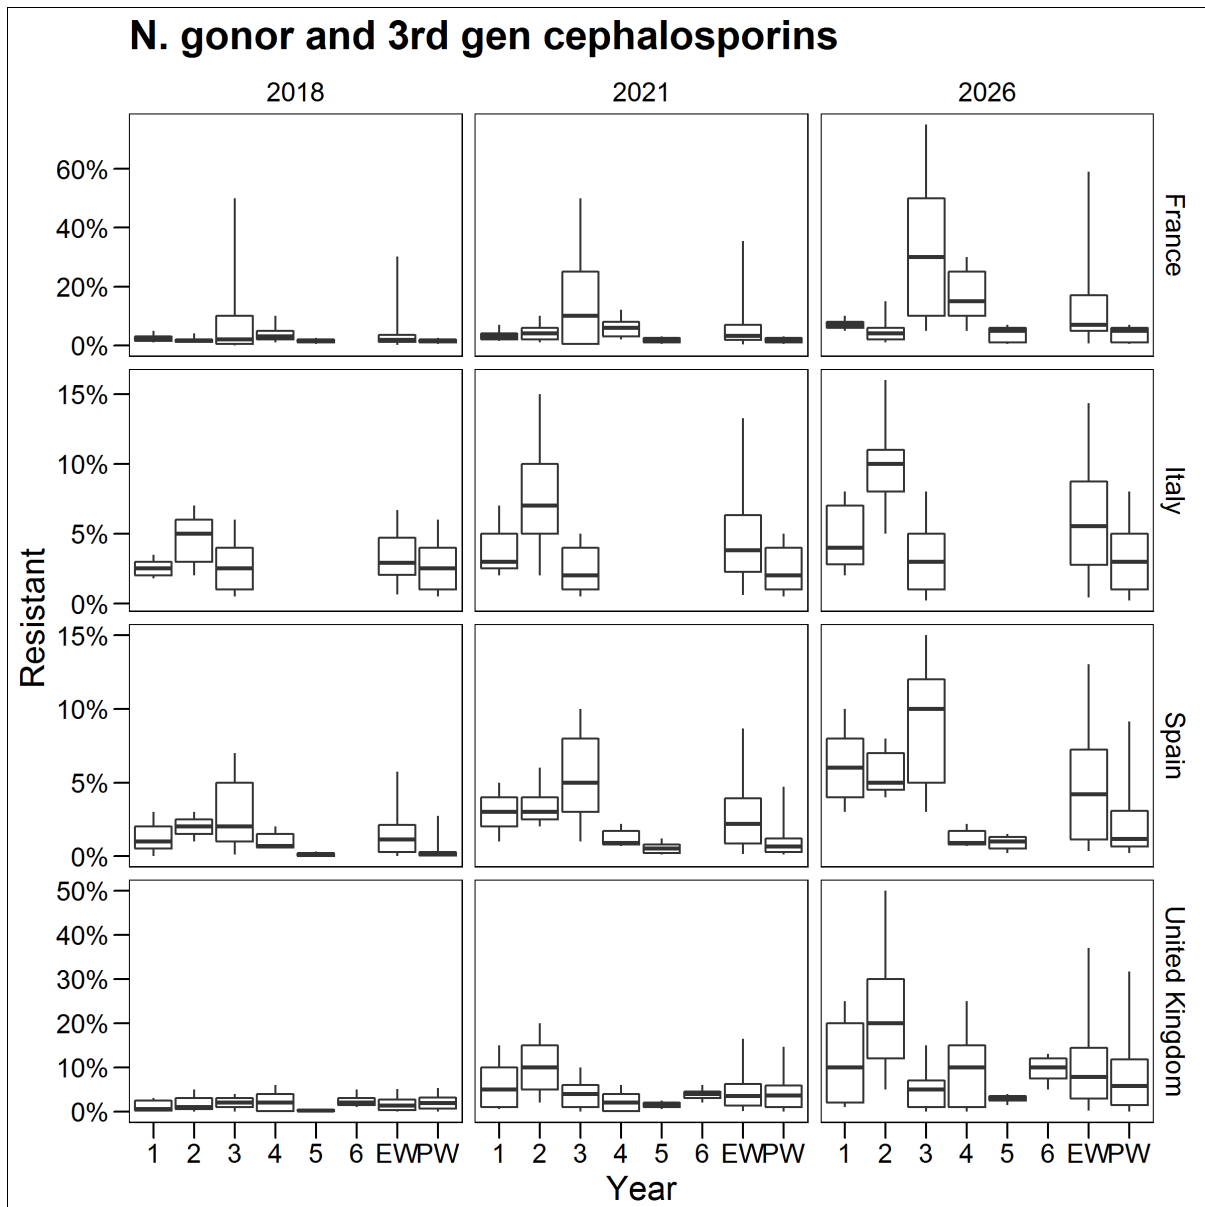

**Fig K. Expert, equal-weight decision maker (EW), and performance-weight decision maker (PW) assessments for pan-drug resistant *Pseudomonas aeruginosa*.** Boxplots show the median estimate, 50% credible range, and 90% credible range.

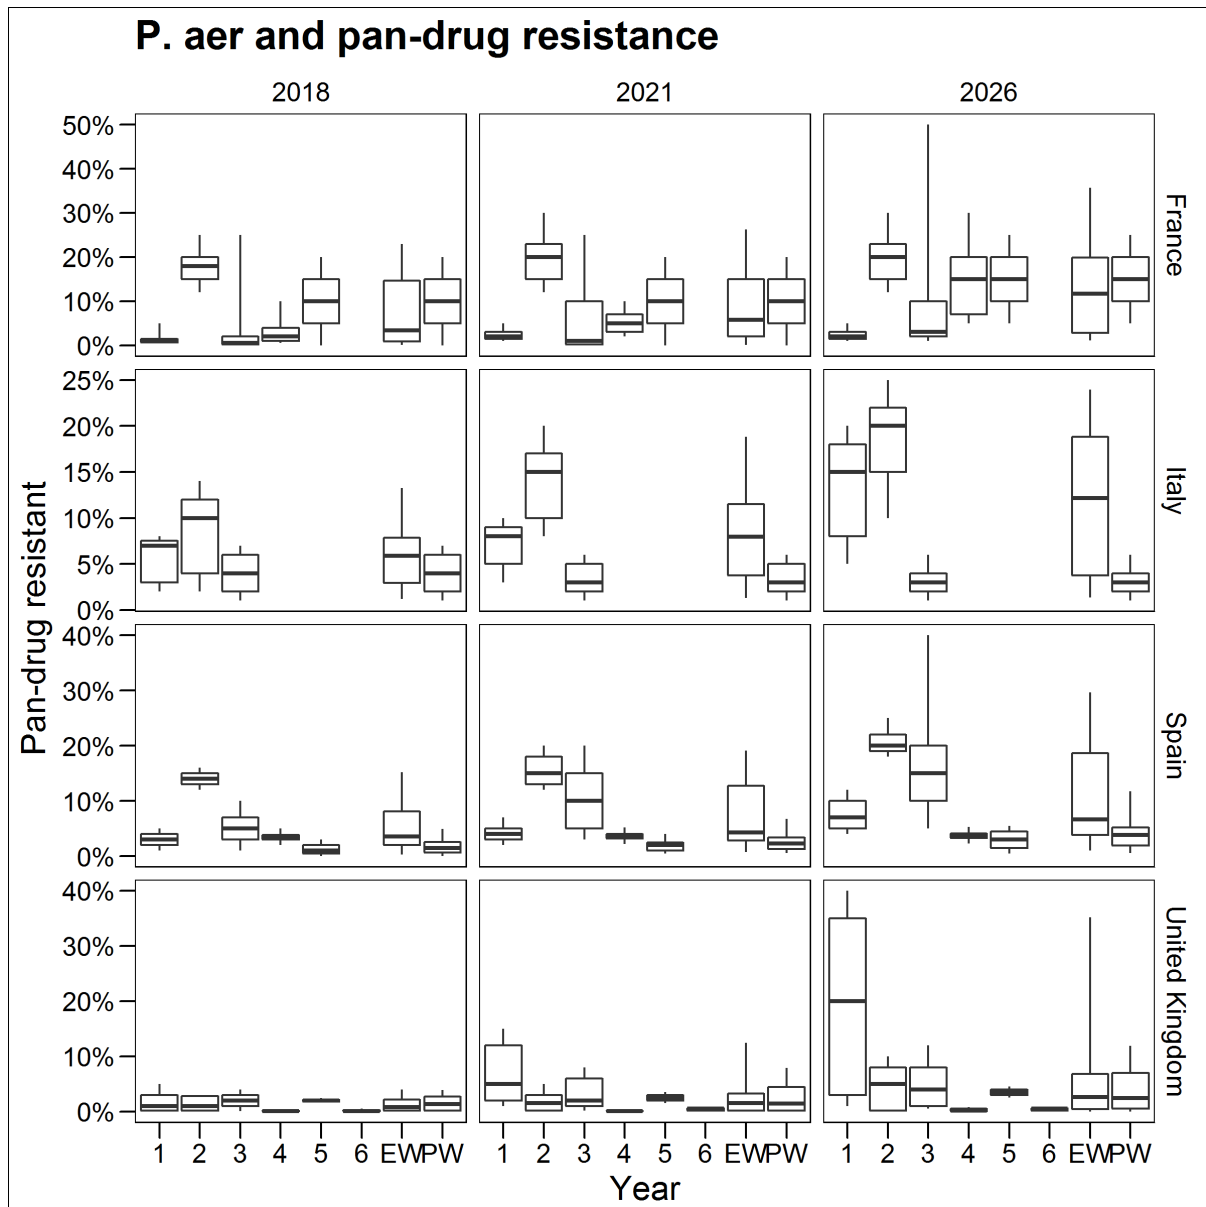

**Fig L. Expert, equal-weight decision maker (EW), and performance-weight decision maker (PW) assessments for items concerning resistance rates at non-invasive sites in 2021.** Boxplots show the median estimate, 50% credible range, and 90% credible range. SST = skin and soft tissue.

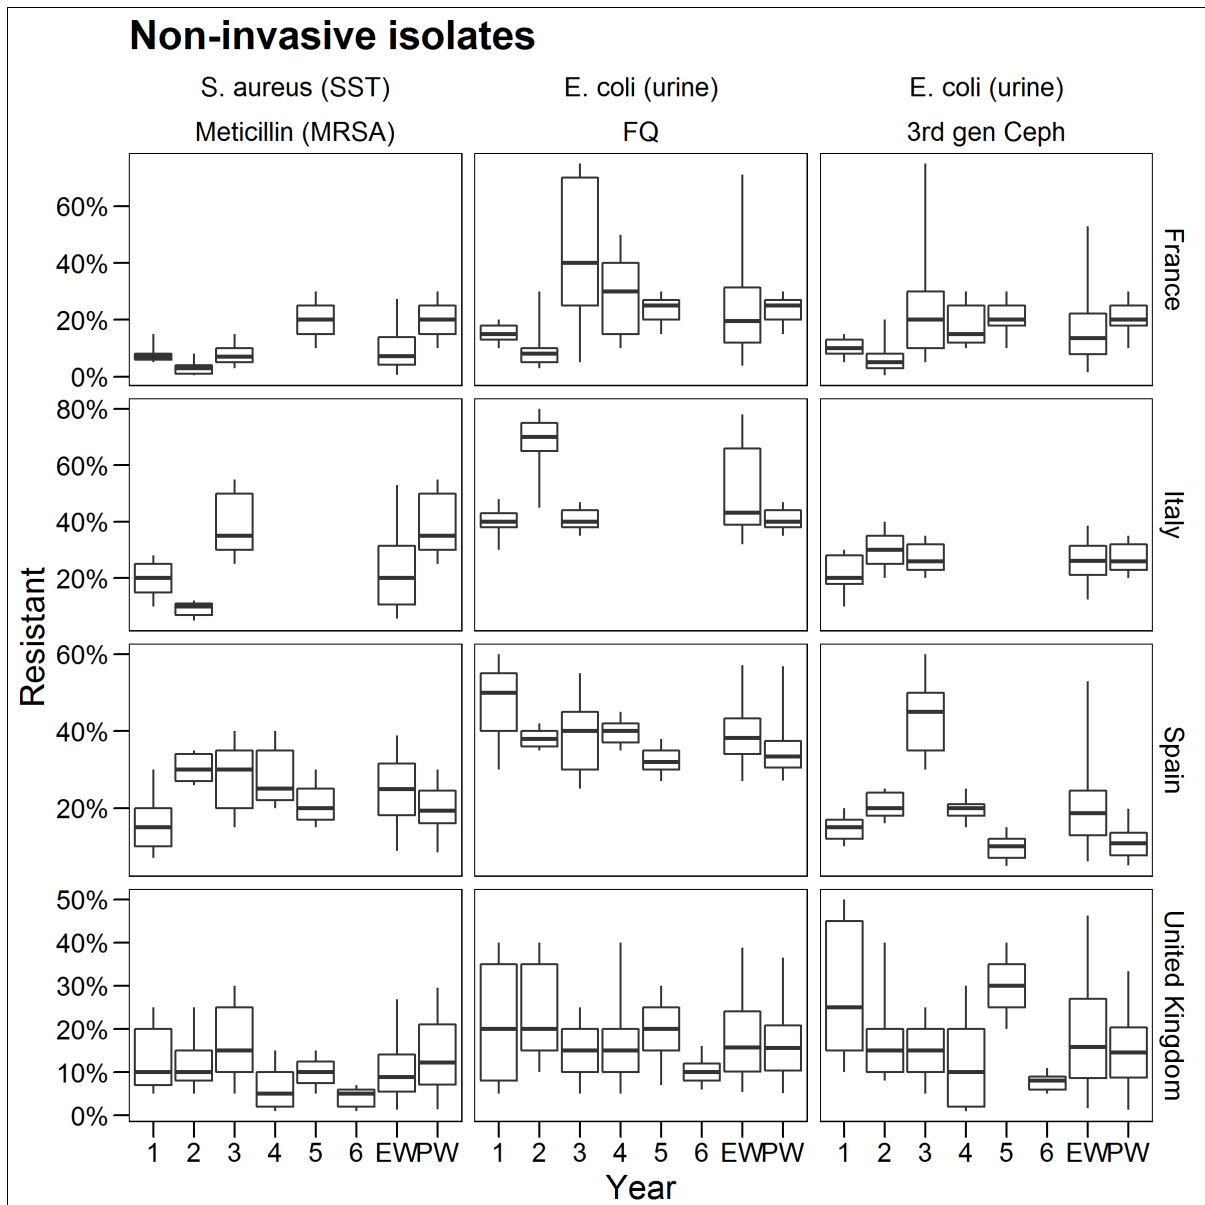

## Primary statistical forecast results

Figs M-P show results from the four primary statistical forecasting models considered:

1. Exponential smoothing with additive error, no trend, and no seasonality [ETS(A,N,N)] (Fig M)
2. Exponential smoothing with additive error, additive trend, and no seasonality [ETS(A,A,N)] (Fig N)
3. Exponential smoothing with additive error, a damped additive trend, and no seasonality [ETS(A,Ad,N)] (Fig O), and
4. An autoregressive integrated moving average (ARIMA) model (Fig P).

**Fig M. Results from exponential smoothing with additive error, no trend, and no seasonality**

**[ETS(A,N,N)].** Black lines indicate the median, dark grey indicates the 50% prediction interval, and light grey indicates the 90% prediction interval. Dots correspond to the median prediction for 2018, 2021, and 2026, the years assessed by the experts. Highlighted cells indicate this is the exponential smoothing model that minimizes  $AIC_c$  for that country-pathogen-antibiotic combination. This model corresponds to Panel C in Figs 2-4 of the main text.

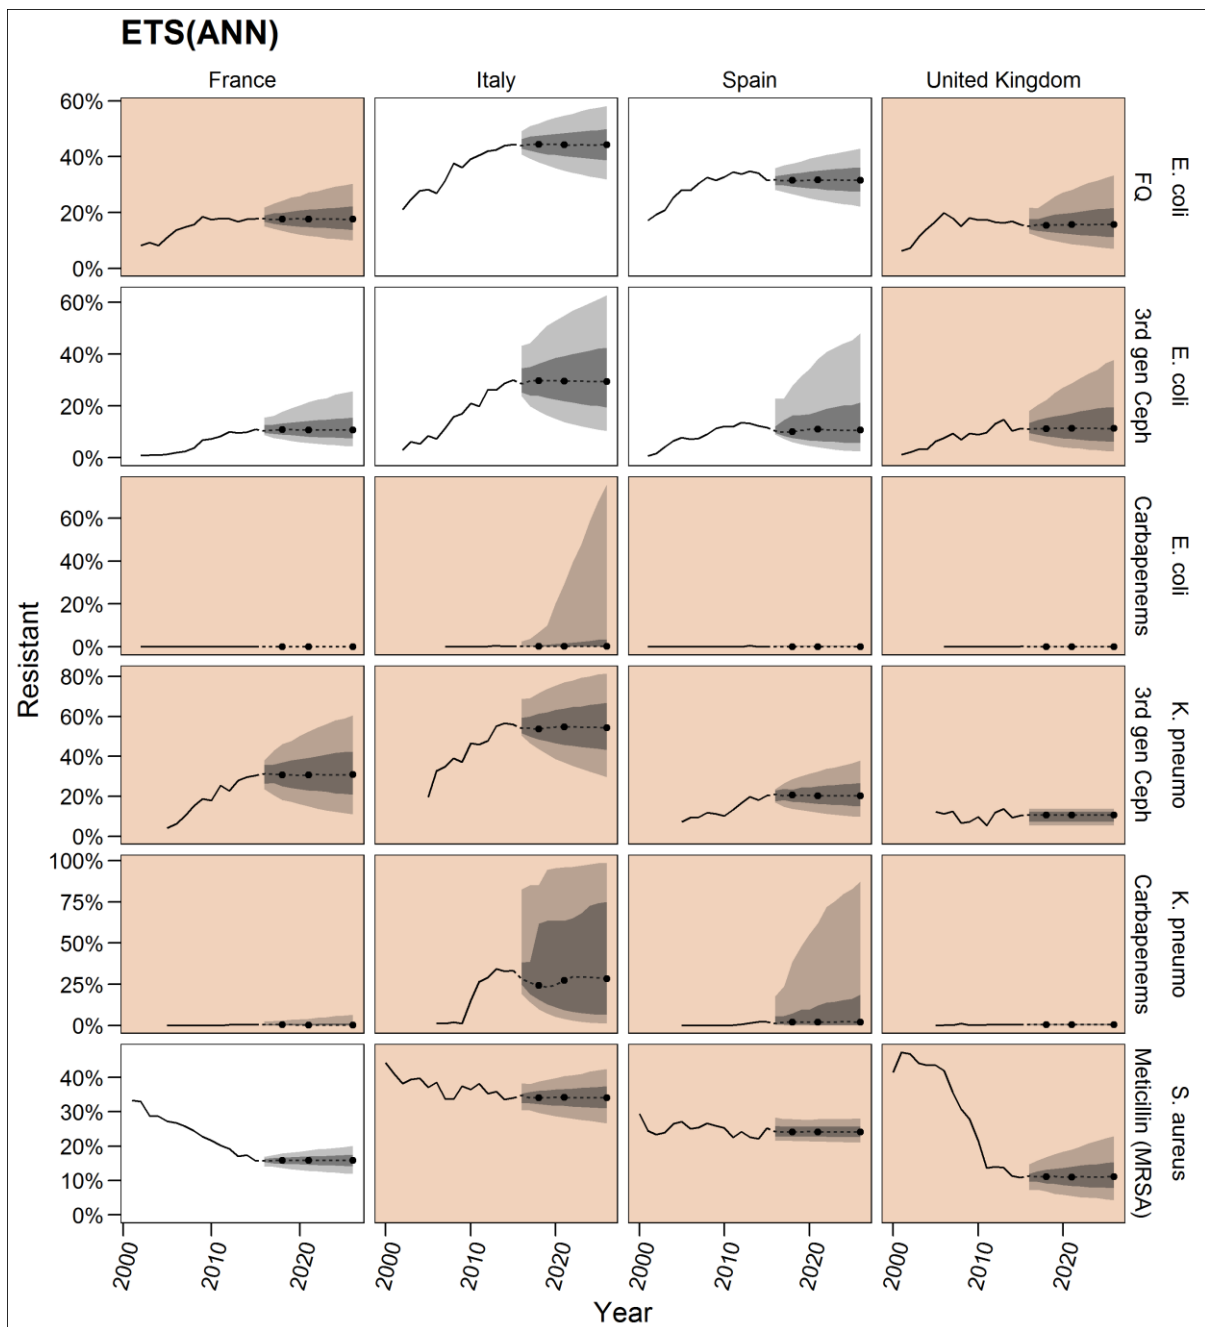



**Fig N. Results from exponential smoothing with additive error, additive trend, and no seasonality [ETS(A,A,N)].** Black lines indicate the median, dark grey indicates the 50% prediction interval, and light grey indicates the 90% prediction interval. Dots correspond to the median prediction for 2018, 2021, and 2026, the years assessed by the experts. Highlighted cells indicate this is the ETS model that minimizes AIC<sub>C</sub> for that country-pathogen-antibiotic combination. This model corresponds to Panel D in Figs 2-4 of the main text.

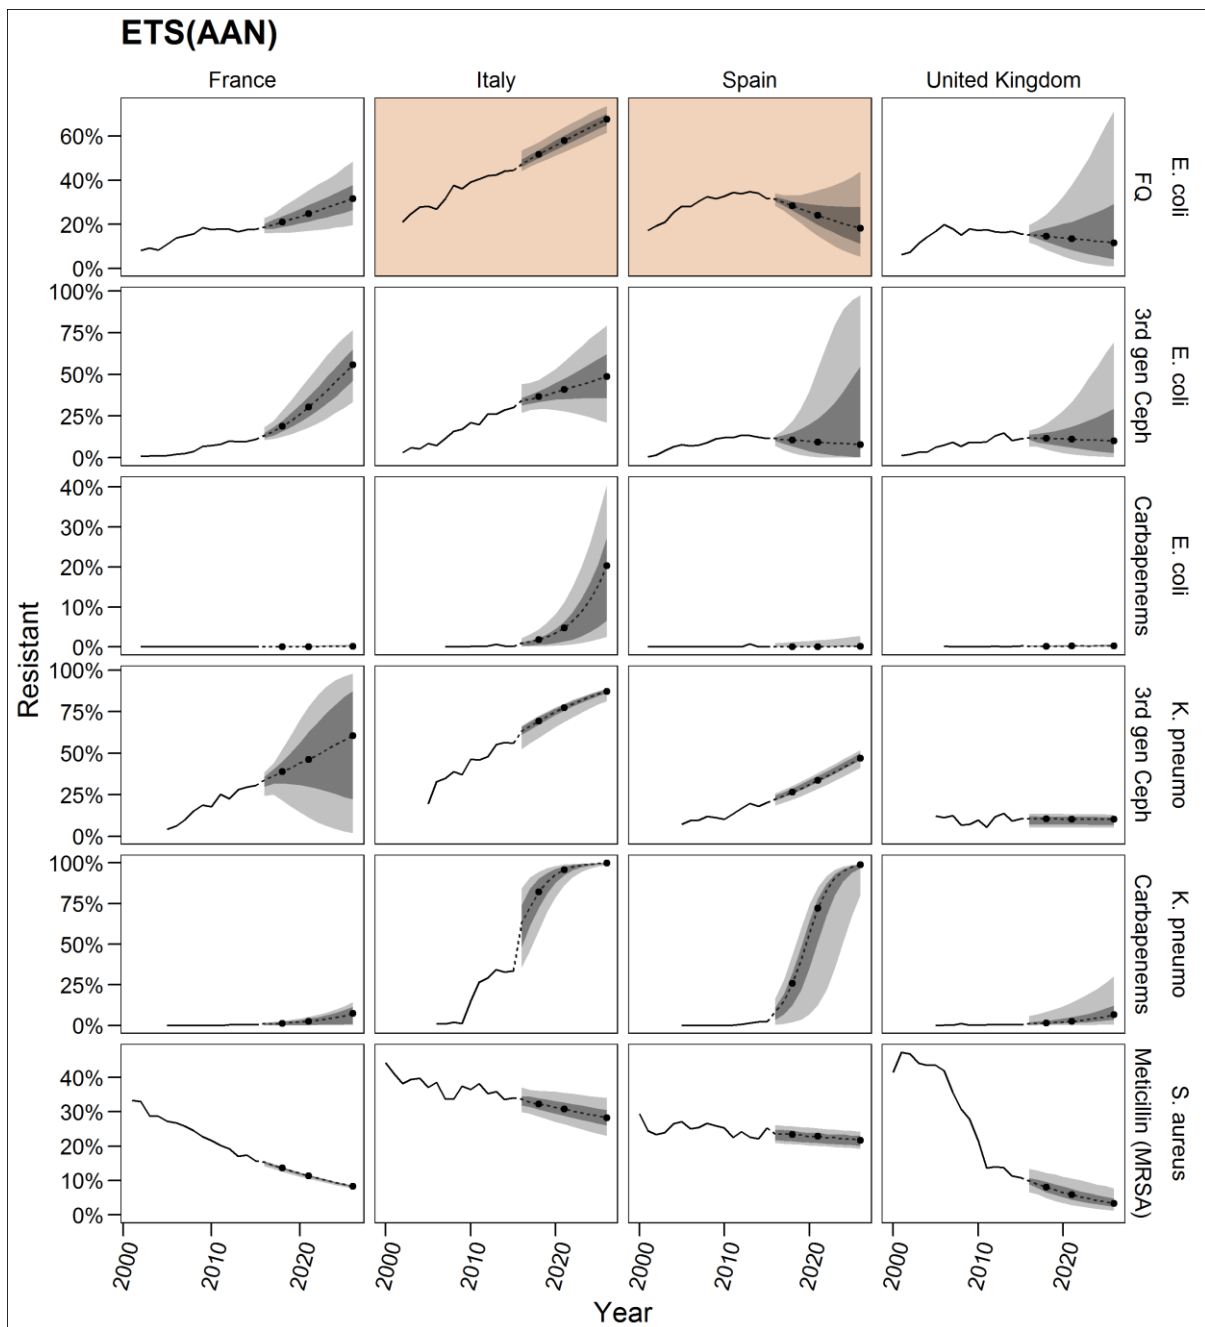





**Fig O. Results from exponential smoothing with additive error, a damped additive trend, and no seasonality [ETS(A,Ad,N)].** Black lines indicate the median, dark grey indicates the 50% prediction interval, and light grey indicates the 90% prediction interval. Dots correspond to the median prediction for 2018, 2021, and 2026, the years assessed by the experts. Highlighted cells indicate this is the ETS model that minimizes  $AIC_c$  for that country-pathogen-antibiotic combination. This model corresponds to Panel E in Figs 2-4 of the main text.

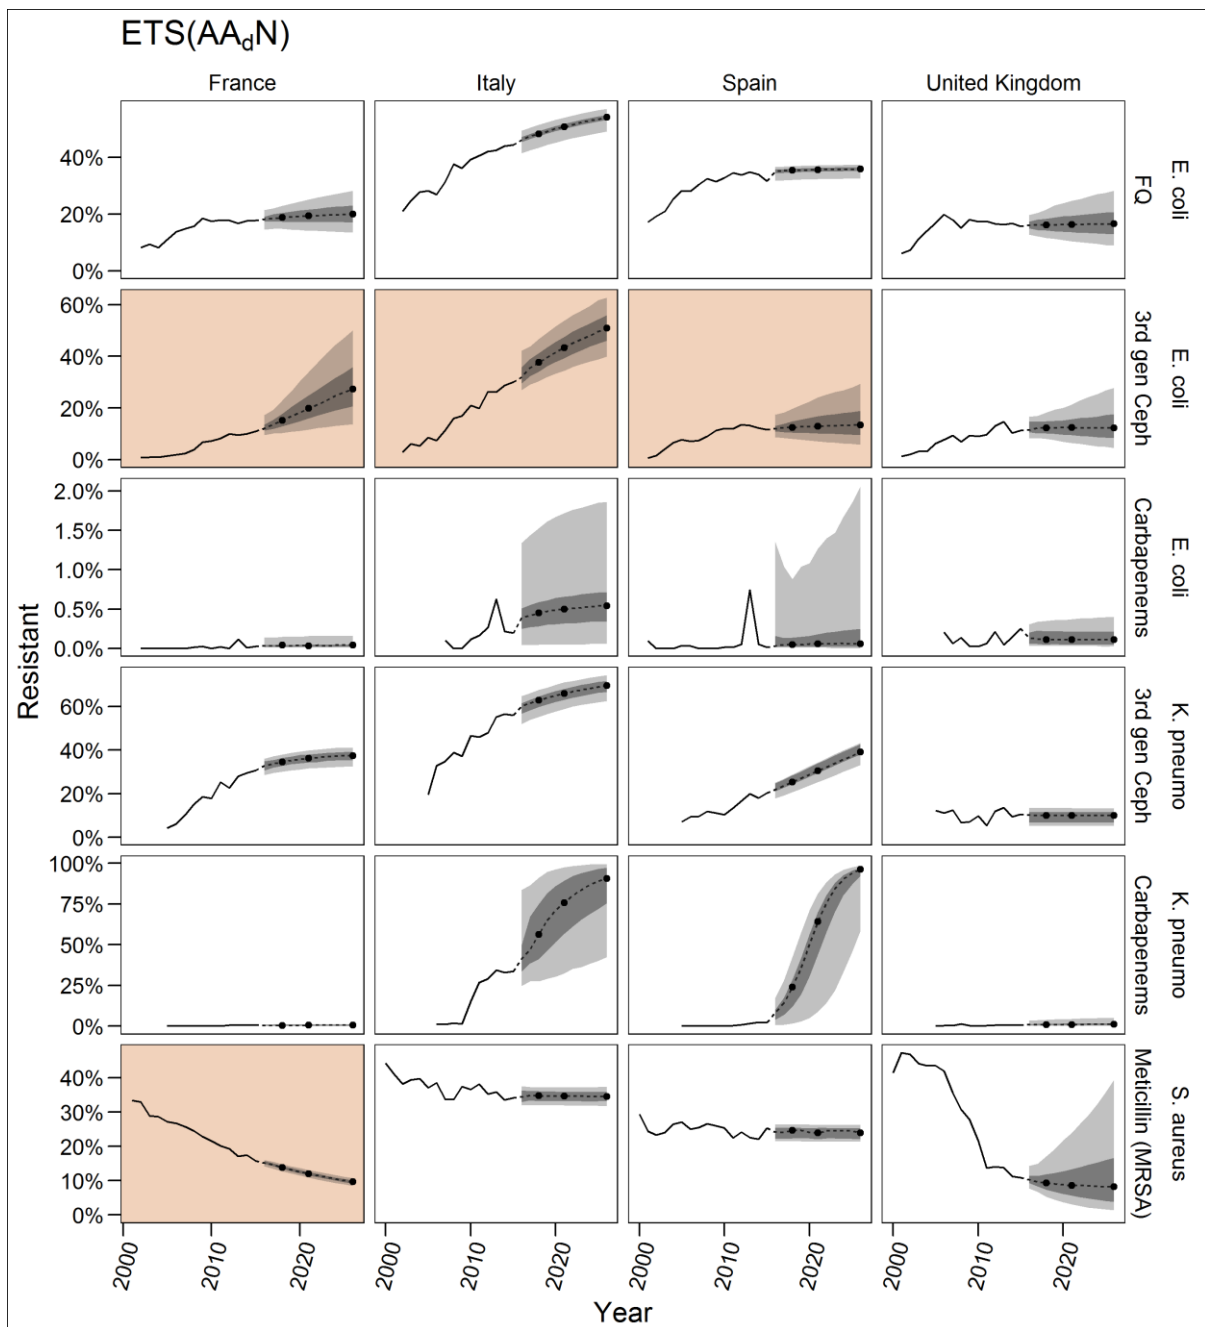



**Fig P. ARIMA forecast results.** Models are labelled with the ARIMA(p,d,q), values selected for that country-pathogen-antibiotic model, where p = the order of the autoregressive model, d = the degree of differencing, and q = the order of the moving average model. Black lines indicate the median, dark grey indicates the 50% prediction interval, and light grey indicates the 90% prediction interval. Dots

correspond to the median prediction for 2018, 2021, and 2026, the years assessed by the experts.

This model corresponds to Panel F in Figs 2-4 of the main text.

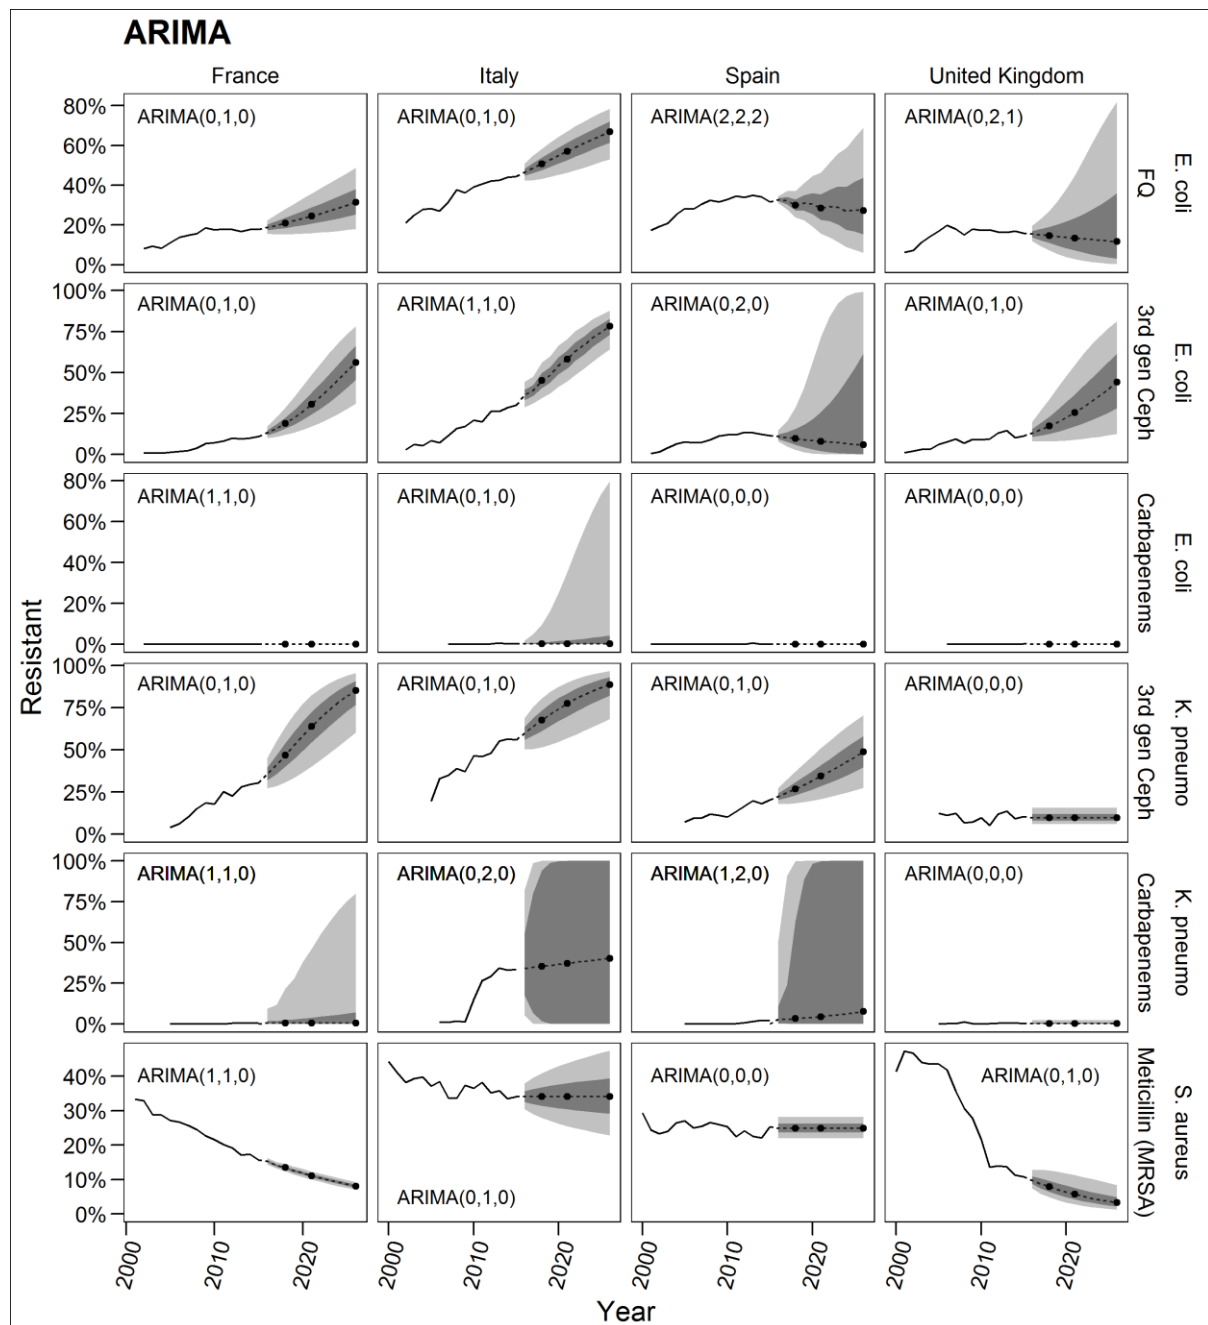

## **Additional statistical forecast results**

In addition to the statistical forecasting models presented in the paper, we considered results from three additional forecasting models. Because combining forecasts using different methods often leads to better accuracy [5], we averaged the ARIMA and exponential smoothing models (Fig Q). We created an ARIMA model that bounds resistance such that it cannot exceed 60% (Fig R), reflecting experts' belief that resistance rates are unlikely to reach 100% as clinicians would adjust prescribing behaviour or other interventions would be undertaken before resistance hits that level. Results from this model do not differ greatly from the normal ARIMA model (Fig P), aside from the decreased maximum value. Finally, we created an exponential smoothing model without the logit transformation (Fig S). This model is equivalent to a linear extrapolation of the historical trend. The resulting projected resistance rates are less than 0% or above 100% for some combinations, demonstrating the need for a transformation or bounding the forecast. The prediction intervals from this model are typically narrower than the prediction intervals from the other statistical forecasts.

**Fig Q. Hybrid forecast result: averaging ARIMA and exponential smoothing.** The ETS model that minimizes AIC<sub>c</sub> was used for the exponential smoothing model. Black lines indicate the median, dark grey indicates the 50% prediction interval, and light grey indicates the 90% prediction interval. Dots correspond to the median prediction for 2018, 2021, and 2026, the years assessed by the experts.

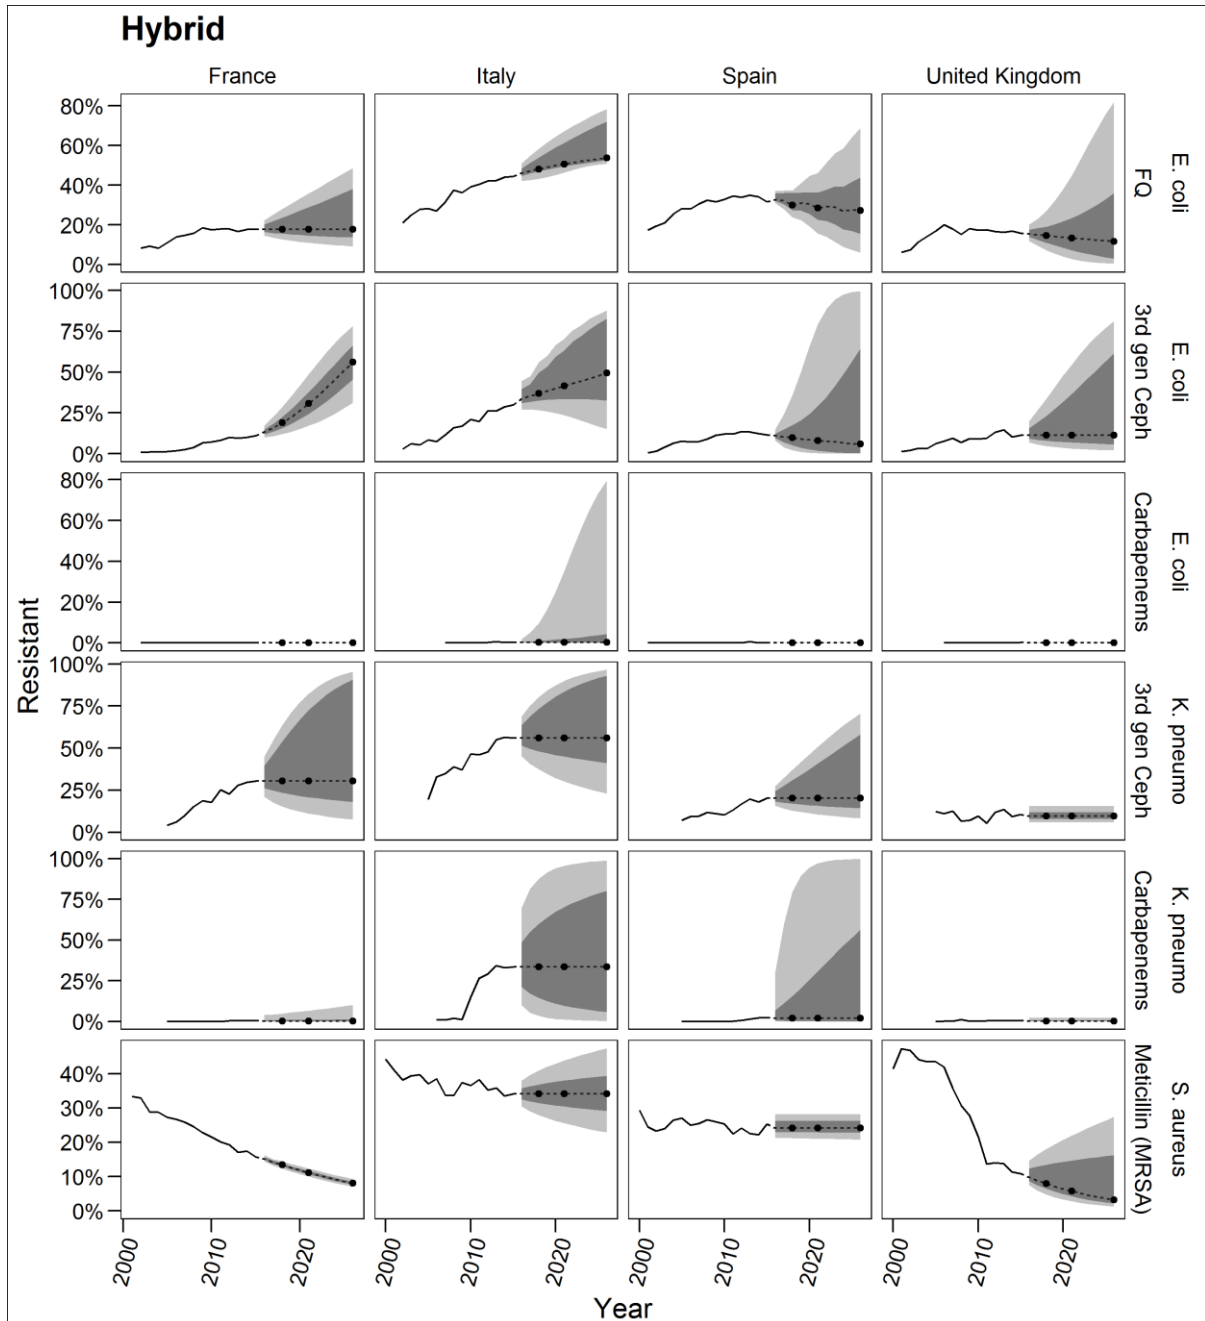

**Fig R. ARIMA forecast results, bounded at 60% resistance.** Black lines indicate the median, dark grey indicates the 50% prediction interval, and light grey indicates the 90% prediction interval. Dots correspond to the median prediction for 2018, 2021, and 2026, the years assessed by the experts.

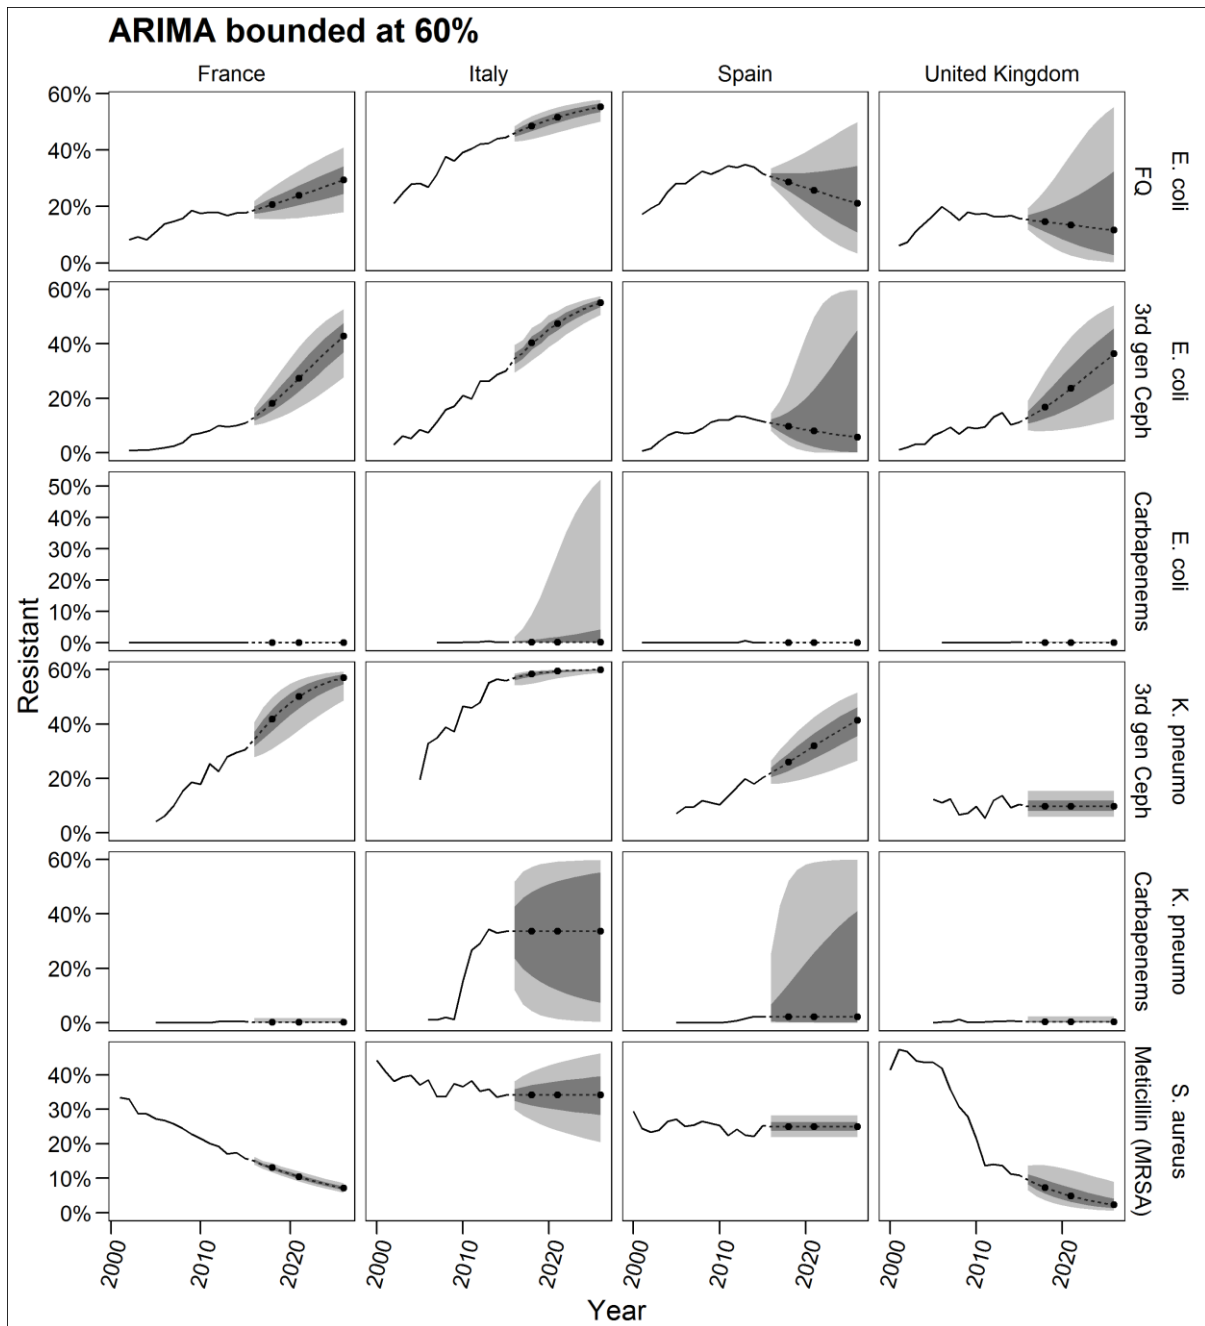

**Fig S. Results from exponential smoothing with additive error, additive trend, and no seasonality**

**[ETS(A,A,N)] and no transformation.** Black lines indicate the median, dark grey indicates the 50% prediction interval, and light grey indicates the 90% prediction interval. Dots correspond to the median prediction for 2018, 2021, and 2026, the years assessed by the experts.

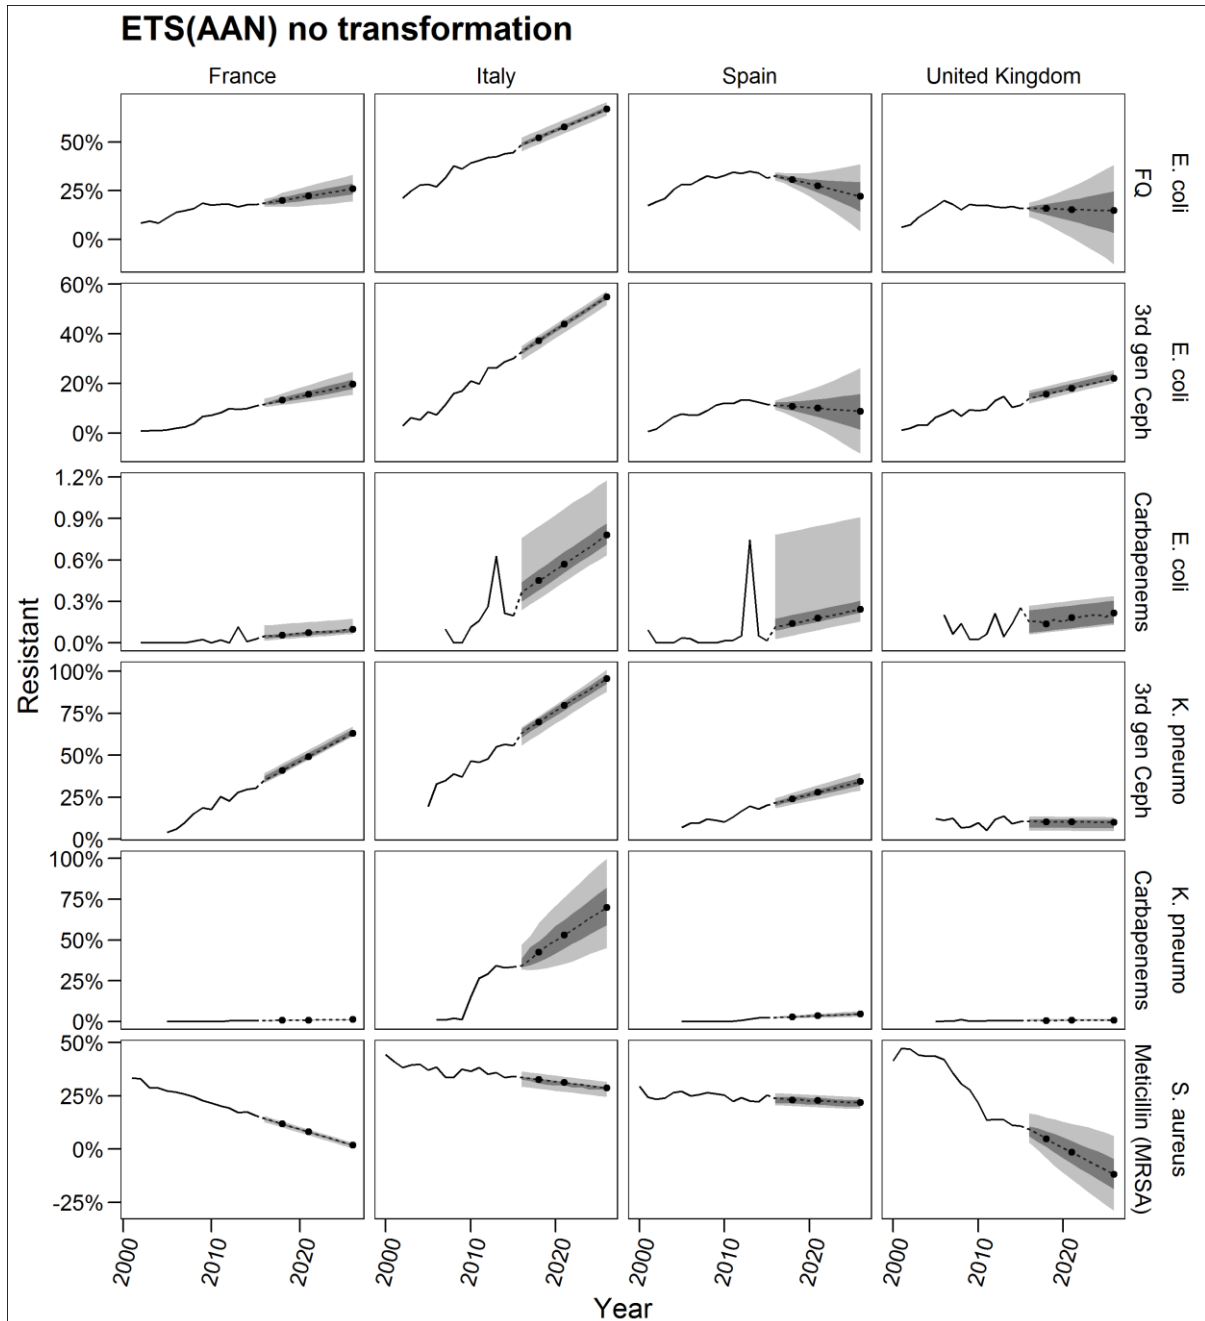



## References

1. Hyndman RJ, Athanasopoulos G. Forecasting: Principles and practice [Internet]. 2014. Available: <https://www.otexts.org/fpp>
2. European Centre for Disease Prevention and Control. Surveillance Atlas of Infectious Diseases [Internet]. 2016 [cited 22 Jun 2017]. Available: <http://atlas.ecdc.europa.eu/public/index.aspx>
3. European Centre for Disease Prevention and Control. Antimicrobial resistance surveillance in Europe 2015 [Internet]. Stockholm: ECDC; 2017 Jan. Available: <http://ecdc.europa.eu/en/publications/Publications/antimicrobial-resistance-europe-2015.pdf>
4. European Centre for Disease Prevention and Control. Gonococcal antimicrobial susceptibility surveillance in Europe, 2014 [Internet]. Stockholm: ECDC; 2016 Aug. Available: <http://ecdc.europa.eu/en/publications/Publications/gonococcal-antimicrobial-susceptibility-surveillance-Europe-2014.pdf>
5. Bates JM, Granger CWJ. The Combination of Forecasts. *OR*. 1969;20: 451–468.  
doi:10.2307/3008764
